# Supplementary material for: Pou5f3, SoxB1, and Nanog remodel chromatin on high nucleosome affinity regions at zygotic genome activation
Source: HighWire-hosted journal article supplement (doi:10.1101/gr.240572.118), 2019-01-23
Supplement: Supplemental_Table_S1_Veil_et_al.xlsx [file Supplemental_Table_S1_Veil_et_al.xlsx]

## Sheet: Supplementa1_Table_1
chr	start	end	number	TFs_binding_group	pou:sox-nonoverl	nanog1,nanog2-nonoverlapping	nucmax_position	nucmax_value	nucmin_position	nucmin_value	strand when oriented_min_to_max_nuc_prediction
chr11	20320898	20321218	1	PSN	3	0	20321063	0.7	20320901	0.366	+
chr4	45520268	45520588	2	PSN	2	1	45520422	0.811	45520570	0.302	-
chr4	52099434	52099754	3	PSN	2	1	52099545	0.816	52099701	0.229	-
chr4	32052033	32052353	4	PSN	2	0	32052207	0.84	32052352	0.208	-
chr4	36016726	36017046	5	PSN	2	2	36016732	0.926	36017043	0.24	-
chr4	39449390	39449710	6	PSN	0	1	NaN	NaN	NaN	NaN	NaN
chr13	8728290	8728610	7	PSN	2	0	8728472	0.721	8728290	0.116	+
chr13	28683181	28683501	8	PSN	0	0	28683417	0.81	28683306	0.326	+
chr3	38381039	38381359	9	PSN	1	0	38381202	0.819	38381054	0.355	+
chr21	20499205	20499525	10	PSN	1	0	20499385	0.747	20499304	0.47	+
chr5	64711890	64712210	11	PSN	1	1	64712145	0.695	64711891	0.273	-
chr2	23655311	23655631	12	PSN	2	0	23655603	0.827	23655498	0.338	-
chr17	23186739	23187059	13	PSN	0	0	23186991	0.899	23186880	0.389	-
chr13	14830654	14830974	14	PSN	0	2	14830808	0.827	14830654	0.0592	+
chr4	36399338	36399658	15	PSN	0	0	NaN	NaN	NaN	NaN	NaN
chr2	42491151	42491471	16	PSN	1	1	42491278	0.653	42491151	0.202	+
chr18	44012359	44012679	17	PSN	0	0	44012359	0.517	44012676	0.0676	-
chr1	42913501	42913821	18	PSN	2	1	42913613	0.868	42913720	0.153	-
chr2	26169573	26169893	19	PSN	1	0	26169783	0.696	26169573	0.139	+
chr24	6778343	6778663	20	PSN	0	0	6778551	0.858	6778406	0.283	+
chr13	53972054	53972374	21	PSN	2	0	NaN	NaN	NaN	NaN	NaN
chr25	26788194	26788514	22	PSN	3	1	26788266	0.689	26788513	0.134	+
chr5	63426869	63427189	23	PSN	1	1	63427048	0.809	63427188	0.154	-
chr20	30131783	30132103	24	PSN	3	0	30132065	0.859	30131784	0.457	+
chr16	21368474	21368794	25	PSN	2	1	21368765	0.706	21368474	0.193	-
chr25	28037303	28037623	26	PSN	0	1	28037392	0.787	28037606	0.315	+
chr14	19661881	19662201	27	PSN	2	1	19662052	0.817	19661881	0.201	+
chr1	24658721	24659041	28	PSN	1	1	24659036	0.667	24658721	0.275	-
chr7	24150303	24150623	29	PSN	1	1	24150452	0.73	24150306	0.179	+
chr22	13251894	13252214	30	PSN	0	0	13252089	0.935	13251894	0.00993	+
chr24	21921269	21921589	31	PSN	0	1	NaN	NaN	NaN	NaN	NaN
chr7	43468849	43469169	32	PSN	1	2	43468947	0.844	43469168	0.355	-
chr15	9535483	9535803	33	PSN	2	0	9535793	0.704	9535483	0.173	+
chr15	29010224	29010544	34	PSN	0	2	29010470	0.795	29010228	0.312	-
chr4	44563599	44563919	35	PSN	2	0	44563777	0.834	44563916	0.338	-
chr13	47027198	47027518	36	PSN	0	0	47027490	0.656	47027198	0.255	-
chr23	28266614	28266934	37	PSN	2	1	NaN	NaN	NaN	NaN	NaN
chr10	18942466	18942786	38	PSN	0	1	18942517	0.892	18942785	0.375	+
chr6	36403285	36403605	39	PSN	2	1	36403501	0.804	36403382	0.369	-
chr20	47147873	47148193	40	PSN	0	0	47148000	0.817	47147873	0.126	+
chr18	43546887	43547207	41	PSN	1	0	43547196	0.824	43546930	0.349	-
chr12	36854453	36854773	42	PSN	0	0	36854609	0.872	36854467	0.427	+
chr11	18519027	18519347	43	PSN	0	0	18519099	0.93	18519331	0.304	+
chr5	8731550	8731870	44	PSN	1	2	NaN	NaN	NaN	NaN	NaN
chr10	43964003	43964323	45	PSN	0	0	43964183	0.852	43964038	0.447	-
chr13	14797455	14797775	46	PSN	2	4	14797687	0.847	14797774	0.392	-
chr14	18684347	18684667	47	PSN	1	1	18684365	0.84	18684515	0.295	-
chr3	15911639	15911959	48	PSN	0	2	15911793	0.87	15911640	0.0469	+
chr7	62388808	62389128	49	PSN	0	1	62388951	0.81	62388811	0.135	+
chr22	18772844	18773164	50	PSN	2	1	NaN	NaN	NaN	NaN	NaN
chr9	24388789	24389109	51	PSN	0	0	24388942	0.684	24388801	0.274	+
chr23	2486232	2486552	52	PSN	2	2	NaN	NaN	NaN	NaN	NaN
chr6	27654071	27654391	53	PSN	1	1	27654142	0.836	27654277	0.429	+
chr19	44806919	44807239	54	PSN	1	0	NaN	NaN	NaN	NaN	NaN
chr5	14879183	14879503	55	PSN	2	1	NaN	NaN	NaN	NaN	NaN
chr1	19599626	19599946	56	PSN	1	1	19599907	0.758	19599764	0.342	+
chr3	40411860	40412180	57	PSN	0	2	40412072	0.936	40411885	0.242	+
chr3	19196854	19197174	58	PSN	0	1	19196960	0.583	19196854	0.292	+
chr24	40371164	40371484	59	PSN	3	0	NaN	NaN	NaN	NaN	NaN
chr1	27720568	27720888	60	PSN	3	0	27720887	0.849	27720777	0.287	-
chr9	23594756	23595076	61	PSN	1	0	23594841	0.949	23594978	0.202	+
chr6	7999571	7999891	62	PSN	2	0	7999774	0.718	7999860	0.417	-
chr15	27718813	27719133	63	PSN	0	1	27718924	0.817	27718823	0.295	+
chr13	12933847	12934167	64	PSN	1	2	12934124	0.831	12934011	0.55	+
chr25	18820510	18820830	65	PSN	3	1	18820613	0.768	18820510	0.408	+
chr4	3330865	3331185	66	PSN	2	0	3331089	0.779	3330992	0.311	-
chr1	44395339	44395659	67	PSN	1	1	44395564	0.574	44395339	0.212	+
chr8	54762158	54762478	68	PSN	1	0	54762409	0.762	54762158	0.332	-
chr7	41733086	41733406	69	PSN	1	0	41733243	0.887	41733373	0.273	-
chr24	13178865	13179185	70	PSN	2	0	13179149	0.768	13178867	0.381	-
chr19	32114880	32115200	71	PSN	0	0	32115018	0.808	32114882	0.175	+
chr10	7995957	7996277	72	PSN	0	1	7996026	0.867	7996146	0.499	-
chr9	10884138	10884458	73	PSN	0	1	10884370	0.935	10884264	0.434	-
chr25	9797831	9798151	74	PSN	1	1	9797880	0.794	9798143	0.186	+
chr21	23813049	23813369	75	PSN	0	0	23813250	0.839	23813062	0.32	+
chr3	60307184	60307504	76	PSN	0	2	60307498	0.83	60307199	0.249	-
chr21	2530300	2530620	77	PSN	2	0	2530345	0.843	2530615	0.446	+
chr7	32321185	32321505	78	PSN	1	1	32321227	0.744	32321298	0.346	+
chr13	14831790	14832110	79	PSN	1	1	14831869	0.755	14832024	0.318	+
chr3	46268312	46268632	80	PSN	1	0	46268546	0.686	46268631	0.364	-
chr5	25871500	25871820	81	PSN	0	2	25871623	0.769	25871500	0.273	+
chr19	31013913	31014233	82	PSN	0	0	31014224	0.842	31014105	0.283	-
chr16	58391820	58392140	83	PSN	3	1	58392074	0.767	58391988	0.367	-
chr4	28550493	28550813	84	PSN	3	0	NaN	NaN	NaN	NaN	NaN
chr18	24708730	24709050	85	PSN	1	1	24708944	0.755	24709049	0.369	-
chr15	24903477	24903797	86	PSN	2	0	NaN	NaN	NaN	NaN	NaN
chr10	33383260	33383580	87	PSN	1	1	33383417	0.836	33383274	0.116	+
chr17	10935273	10935593	88	PSN	2	3	10935322	0.842	10935502	0.513	+
chr23	23081198	23081518	89	PSN	2	0	23081402	0.781	23081286	0.418	-
chr7	44204063	44204383	90	PSN	0	1	44204200	0.779	44204063	0.284	+
chr5	34419226	34419546	91	PSN	0	0	NaN	NaN	NaN	NaN	NaN
chr4	11111913	11112233	92	PSN	0	0	11112084	0.744	11112023	0.585	+
chr1	51431718	51432038	93	PSN	3	1	51432007	0.742	51431930	0.373	-
chr3	39657711	39658031	94	PSN	0	3	39657869	0.905	39658013	0.234	-
chr6	30123128	30123448	95	PSN	1	2	NaN	NaN	NaN	NaN	NaN
chr22	11484553	11484873	96	PSN	0	0	11484859	0.942	11484747	0.419	-
chr13	18491512	18491832	97	PSN	2	1	NaN	NaN	NaN	NaN	NaN
chr20	2762932	2763252	98	PSN	1	0	2763003	0.884	2763113	0.522	-
chr9	43784379	43784699	99	PSN	2	0	43784652	0.641	43784380	0.227	-
chr21	11894971	11895291	100	PSN	0	1	11895061	0.893	11895288	0.585	+
chr22	16718743	16719063	101	PSN	2	0	NaN	NaN	NaN	NaN	NaN
chr17	9797276	9797596	102	PSN	1	0	9797501	0.727	9797289	0.153	-
chr6	15639740	15640060	103	PSN	2	1	15640059	0.769	15639740	0.117	-
chr13	28357692	28358012	104	PSN	2	0	28357943	0.861	28357837	0.45	-
chr5	36911429	36911749	105	PSN	2	1	36911577	0.822	36911437	0.115	+
chr5	38211838	38212158	106	PSN	2	0	38211838	0.923	38211915	0.345	+
chr15	18849757	18850077	107	PSN	2	1	NaN	NaN	NaN	NaN	NaN
chr18	40047084	40047404	108	PSN	3	0	40047122	0.824	40047333	0.438	+
chr4	13280387	13280707	109	PSN	0	1	NaN	NaN	NaN	NaN	NaN
chr19	11900850	11901170	110	PSN	2	0	11900994	0.755	11901169	0.13	-
chr5	29176835	29177155	111	PSN	1	1	29176981	0.895	29176835	0.0786	+
chr9	34387721	34388041	112	PSN	1	1	34387918	0.835	34388040	0.334	-
chr23	33759893	33760213	113	PSN	2	1	33760181	0.739	33759961	0.442	-
chr12	33085585	33085905	114	PSN	2	0	NaN	NaN	NaN	NaN	NaN
chr10	43619210	43619530	115	PSN	3	0	43619295	0.878	43619430	0.333	-
chr6	31425223	31425543	116	PSN	0	3	31425401	0.88	31425542	0.239	-
chr5	29167133	29167453	117	PSN	2	0	29167393	0.689	29167151	0.464	-
chr17	22348508	22348828	118	PSN	2	0	22348686	0.836	22348827	0.229	-
chr1	4212547	4212867	119	PSN	1	0	4212769	0.74	4212705	0.455	+
chr13	5854078	5854398	120	PSN	1	1	5854363	0.835	5854078	0.403	-
chr23	19848360	19848680	121	PSN	1	1	19848605	0.794	19848360	0.345	+
chr8	54944022	54944342	122	PSN	0	2	54944114	0.871	54944341	0.258	+
chr17	37660705	37661025	123	PSN	0	1	37660940	0.835	37660717	0.423	-
chr8	54038978	54039298	124	PSN	1	0	NaN	NaN	NaN	NaN	NaN
chr23	13025820	13026140	125	PSN	0	0	13026052	0.838	13025872	0.188	-
chr24	2472530	2472850	126	PSN	1	2	NaN	NaN	NaN	NaN	NaN
chr6	15645988	15646308	127	PSN	1	1	15646127	0.883	15646056	0.352	+
chr9	38559377	38559697	128	PSN	1	0	38559377	0.784	38559480	0.381	-
chr24	9279909	9280229	129	PSN	1	1	9280090	0.677	9280228	0.3	-
chr16	14833650	14833970	130	PSN	2	0	14833790	0.704	14833698	0.385	+
chr8	29525719	29526039	131	PSN	0	1	29525865	0.652	29525720	0.331	+
chr17	16057394	16057714	132	PSN	0	0	16057516	0.824	16057713	0.397	-
chr11	26898856	26899176	133	PSN	2	0	26899119	0.661	26898996	0.268	+
chr14	40340012	40340332	134	PSN	1	1	NaN	NaN	NaN	NaN	NaN
chr7	36397070	36397390	135	PSN	0	0	36397200	0.794	36397339	0.472	-
chr18	32945280	32945600	136	PSN	1	2	32945433	0.786	32945532	0.455	-
chr18	27562628	27562948	137	PSN	1	1	27562852	0.835	27562669	0.131	+
chr25	16351150	16351470	138	PSN	0	1	16351412	0.859	16351312	0.383	-
chr3	45825975	45826295	139	PSN	4	2	45826286	0.775	45826151	0.324	+
chr18	20005505	20005825	140	PSN	0	1	20005672	0.826	20005593	0.353	+
chr12	38984878	38985198	141	PSN	0	0	38985012	0.733	38984878	0.336	+
chr15	19189835	19190155	142	PSN	0	1	19189978	0.86	19189845	0.249	+
chr3	40759151	40759471	143	PSN	0	0	40759385	0.924	40759254	0.399	+
chr10	37903484	37903804	144	PSN	3	1	37903496	0.701	37903702	0.269	+
chr3	14999638	14999958	145	PSN	2	0	14999667	0.842	14999759	0.57	+
chr20	32216206	32216526	146	PSN	0	1	NaN	NaN	NaN	NaN	NaN
chr1	4179045	4179365	147	PSN	0	1	4179115	0.899	4179261	0.455	+
chr5	68958305	68958625	148	PSN	2	1	NaN	NaN	NaN	NaN	NaN
chr12	45629721	45630041	149	PSN	1	0	45629849	0.725	45629725	0.108	+
chr14	5938804	5939124	150	PSN	1	0	5939020	0.765	5939123	0.428	-
chr7	54089970	54090290	151	PSN	1	1	54090164	0.858	54090279	0.0878	-
chr9	48817524	48817844	152	PSN	3	0	NaN	NaN	NaN	NaN	NaN
chr18	44764063	44764383	153	PSN	3	1	44764239	0.695	44764382	0.38	-
chr20	27772955	27773275	154	PSN	1	0	NaN	NaN	NaN	NaN	NaN
chr7	30796114	30796434	155	PSN	1	1	30796215	0.819	30796114	0.188	+
chr17	24111658	24111978	156	PSN	4	0	24111820	0.833	24111683	0.242	+
chr10	19276756	19277076	157	PSN	1	1	19276895	0.626	19276764	0.126	+
chr25	12305984	12306304	158	PSN	0	1	12306116	0.757	12305991	0.25	+
chr11	14565209	14565529	159	PSN	1	1	14565419	0.796	14565209	0.302	+
chr15	29866903	29867223	160	PSN	1	0	29866965	0.84	29867099	0.546	-
chr14	5555121	5555441	161	PSN	3	1	5555379	0.794	5555262	0.405	-
chr22	35108734	35109054	162	PSN	1	0	35108806	0.922	35108882	0.473	+
chr3	60440363	60440683	163	PSN	0	2	60440603	0.882	60440363	0.239	-
chr23	37902578	37902898	164	PSN	0	2	NaN	NaN	NaN	NaN	NaN
chr8	12950035	12950355	165	PSN	0	0	12950186	0.708	12950078	0.216	+
chr5	67012855	67013175	166	PSN	0	0	67012954	0.879	67012855	0.338	+
chr20	33416828	33417148	167	PSN	0	2	33417101	0.855	33416828	0.243	-
chr11	18805473	18805793	168	PSN	0	0	18805740	0.844	18805640	0.455	-
chr19	22162685	22163005	169	PSN	0	2	22162970	0.74	22162689	0.266	-
chr11	5780495	5780815	170	PSN	3	0	NaN	NaN	NaN	NaN	NaN
chr17	8154980	8155300	171	PSN	0	1	8155022	0.917	8155160	0.572	+
chr5	40452797	40453117	172	PSN	2	3	40452986	0.764	40452810	0.276	+
chr4	48573220	48573540	173	PSN	1	1	48573408	0.812	48573261	0.284	+
chr9	35783921	35784241	174	PSN	0	1	35784198	0.839	35783924	0.486	-
chr12	10225716	10226036	175	PSN	1	0	10225893	0.657	10225764	0.305	+
chr2	21543797	21544117	176	PSN	0	0	21543845	0.872	21544116	0.476	+
chr7	43057513	43057833	177	PSN	1	1	43057801	0.753	43057607	0.482	+
chr24	17690950	17691270	178	PSN	2	1	17691148	0.818	17690950	0.184	-
chr15	29127288	29127608	179	PSN	0	1	29127479	0.882	29127607	0.134	-
chr5	9418503	9418823	180	PSN	2	2	9418595	0.739	9418822	0.147	+
chr3	41903815	41904135	181	PSN	1	1	41904019	0.714	41903855	0.379	-
chr20	28396808	28397128	182	PSN	2	1	28396946	0.758	28396808	0.443	+
chr8	30955146	30955466	183	PSN	2	1	30955233	0.571	30955389	0.223	-
chr4	31589139	31589459	184	PSN	3	0	31589348	0.794	31589149	0.0549	+
chr24	4560366	4560686	185	PSN	1	1	4560574	0.784	4560426	0.353	+
chr7	44599722	44600042	186	PSN	1	1	44599889	0.767	44599751	0.335	+
chr8	39507446	39507766	187	PSN	1	1	39507615	0.697	39507446	0.186	+
chr19	43842664	43842984	188	PSN	1	0	43842870	0.754	43842768	0.555	+
chr2	16521343	16521663	189	PSN	3	0	NaN	NaN	NaN	NaN	NaN
chr16	44878887	44879207	190	PSN	0	1	44879062	0.91	44878897	0.128	+
chr5	45164011	45164331	191	PSN	1	0	45164187	0.796	45164025	0.124	+
chr15	24019120	24019440	192	PSN	1	2	24019337	0.765	24019141	0.348	-
chr24	9090289	9090609	193	PSN	3	0	9090354	0.784	9090509	0.415	+
chr5	65958457	65958777	194	PSN	3	2	65958661	0.819	65958538	0.428	-
chr13	36315455	36315775	195	PSN	2	0	36315558	0.901	36315637	0.294	-
chr16	39491218	39491538	196	PSN	1	2	39491311	0.83	39491420	0.489	-
chr19	43848160	43848480	197	PSN	0	0	43848366	0.966	43848227	0.0671	+
chr10	10981670	10981990	198	PSN	1	0	10981894	0.675	10981981	0.32	-
chr2	48188069	48188389	199	PSN	0	0	48188270	0.831	48188083	0.00524	+
chr23	29967361	29967681	200	PSN	2	2	29967658	0.857	29967437	0.416	-
chr20	23012806	23013126	201	PSN	0	1	23012924	0.797	23012990	0.496	+
chr19	24611838	24612158	202	PSN	4	0	24611906	0.828	24612148	0.396	+
chr8	49093550	49093870	203	PSN	1	0	49093816	0.858	49093550	0.215	-
chr12	24843145	24843465	204	PSN	0	0	NaN	NaN	NaN	NaN	NaN
chr7	27563930	27564250	205	PSN	0	1	27564091	0.884	27564015	0.442	+
chr21	23902880	23903200	206	PSN	1	1	23902998	0.821	23903162	0.308	+
chr9	29548486	29548806	207	PSN	2	0	29548665	0.765	29548584	0.36	+
chr11	35628286	35628606	208	PSN	1	2	35628421	0.673	35628460	0.449	+
chr8	22546558	22546878	209	PSN	2	2	22546744	0.906	22546874	0.207	-
chr20	43140689	43141009	210	PSN	0	2	43140840	0.881	43140694	0.435	+
chr3	26575451	26575771	211	PSN	0	1	26575457	0.734	26575770	0.397	+
chr20	26447681	26448001	212	PSN	0	0	NaN	NaN	NaN	NaN	NaN
chr7	56004067	56004387	213	PSN	1	0	56004094	0.779	56004210	0.507	+
chr11	36453949	36454269	214	PSN	1	1	36454071	0.793	36453949	0.351	+
chr11	28842175	28842495	215	PSN	2	0	28842321	0.781	28842460	0.301	-
chr10	17457396	17457716	216	PSN	2	0	17457695	0.75	17457548	0.314	+
chr8	54433633	54433953	217	PSN	2	2	NaN	NaN	NaN	NaN	NaN
chr23	3774892	3775212	218	PSN	3	1	3774994	0.763	3775120	0.388	+
chr24	9091141	9091461	219	PSN	0	3	9091288	0.822	9091141	0.296	+
chr23	24670554	24670874	220	PSN	1	0	24670554	0.8	24670800	0.253	+
chr9	14884696	14885016	221	PSN	1	0	14884969	0.756	14884726	0.196	+
chr15	5894319	5894639	222	PSN	2	1	5894334	0.709	5894462	0.23	+
chr19	30638476	30638796	223	PSN	1	3	30638711	0.828	30638476	0.376	-
chr20	41325107	41325427	224	PSN	1	1	41325416	0.775	41325126	0.398	+
chr5	48292419	48292739	225	PSN	1	3	48292500	0.812	48292738	0.472	+
chr23	39086465	39086785	226	PSN	0	1	39086597	0.75	39086755	0.396	-
chr3	48005186	48005506	227	PSN	3	0	48005301	0.738	48005447	0.227	-
chr8	39456857	39457177	228	PSN	1	2	39456868	0.701	39457176	0.0996	-
chr15	46180263	46180583	229	PSN	0	2	46180453	0.902	46180579	0.257	-
chr9	16867030	16867350	230	PSN	1	1	16867043	0.952	16867162	0.347	+
chr16	55009876	55010196	231	PSN	2	1	55010101	0.844	55010195	0.388	-
chr20	16782519	16782839	232	PSN	0	1	16782650	0.883	16782838	0.139	+
chr24	13905043	13905363	233	PSN	0	1	13905232	0.9	13905086	0.0541	+
chr9	27134947	27135267	234	PSN	0	1	27135026	0.706	27135265	0.246	+
chr20	8173001	8173321	235	PSN	0	0	NaN	NaN	NaN	NaN	NaN
chr12	13464656	13464976	236	PSN	0	2	13464692	0.866	13464971	0.368	+
chr15	28701142	28701462	237	PSN	1	2	28701371	0.603	28701305	0.427	-
chr2	27629669	27629989	238	PSN	1	1	27629757	0.765	27629855	0.407	-
chr7	47066774	47067094	239	PSN	0	0	47066997	0.911	47066879	0.478	-
chr9	7760150	7760470	240	PSN	1	0	7760315	0.824	7760463	0.169	-
chr25	398412	398732	241	PSN	0	0	398504	0.888	398613	0.456	+
chr20	42380955	42381275	242	PSN	1	0	42381150	0.842	42381274	0.348	-
chr15	28987262	28987582	243	PSN	2	2	28987557	0.722	28987273	0.332	-
chr5	27406702	27407022	244	PSN	0	0	27406900	0.773	27407019	0.324	-
chr14	17725297	17725617	245	PSN	3	0	17725456	0.76	17725611	0.155	-
chr17	51098567	51098887	246	PSN	1	0	51098780	0.719	51098567	0.382	-
chr12	19066046	19066366	247	PSN	0	0	19066185	0.662	19066073	0.162	+
chr13	28752302	28752622	248	PSN	3	1	28752363	0.812	28752609	0.15	+
chr5	23846823	23847143	249	PSN	1	2	23847022	0.717	23847142	0.384	-
chr10	27608060	27608380	250	PSN	1	4	27608291	0.825	27608379	0.457	-
chr3	16081637	16081957	251	PSN	0	0	16081855	0.758	16081956	0.384	-
chr7	29920563	29920883	252	PSN	1	0	29920846	0.764	29920652	0.358	-
chr8	20541349	20541669	253	PSN	1	1	20541627	0.69	20541352	0.0654	+
chr8	15734181	15734501	254	PSN	0	3	15734268	0.847	15734500	0.338	+
chr2	23732373	23732693	255	PSN	1	2	23732522	0.712	23732689	0.246	-
chr18	10757157	10757477	256	PSN	2	0	10757159	0.847	10757244	0.24	-
chr19	15473154	15473474	257	PSN	2	1	15473315	0.511	15473168	0.124	+
chr6	38777522	38777842	258	PSN	1	2	NaN	NaN	NaN	NaN	NaN
chr1	16058882	16059202	259	PSN	2	1	16058963	0.88	16059201	0.34	+
chr22	18784621	18784941	260	PSN	0	0	18784694	0.961	18784783	0.456	+
chr18	43028279	43028599	261	PSN	0	0	43028372	0.883	43028598	0.25	+
chr2	10172370	10172690	262	PSN	2	0	10172472	0.74	10172689	0.28	+
chr23	39406005	39406325	263	PSN	4	2	NaN	NaN	NaN	NaN	NaN
chr13	24885106	24885426	264	PSN	0	0	24885252	0.822	24885119	0.229	+
chr3	26035836	26036156	265	PSN	1	2	26035889	0.813	26036027	0.289	+
chr10	35731925	35732245	266	PSN	2	1	35731948	0.933	35732079	0.391	+
chr19	19235585	19235905	267	PSN	0	1	19235763	0.803	19235623	0.204	+
chr2	8420516	8420836	268	PSN	0	0	8420728	0.688	8420520	0.208	+
chr9	43465317	43465637	269	PSN	0	2	43465548	0.784	43465472	0.511	-
chr10	43713200	43713520	270	PSN	1	2	43713355	0.873	43713200	0.199	+
chr18	44119933	44120253	271	PSN	1	0	44120240	0.686	44119933	0.264	-
chr6	15640155	15640475	272	PSN	1	0	15640262	0.817	15640179	0.543	+
chr24	20307324	20307644	273	PSN	1	1	20307382	0.609	20307636	0.331	+
chr9	46862037	46862357	274	PSN	1	0	46862269	0.769	46862045	0.333	+
chr19	12703153	12703473	275	PSN	3	1	12703260	0.836	12703397	0.37	-
chr13	33249313	33249633	276	PSN	1	0	33249450	0.867	33249594	0.19	-
chr17	27110904	27111224	277	PSN	1	1	27110974	0.849	27110904	0.287	+
chr13	39797912	39798232	278	PSN	1	0	NaN	NaN	NaN	NaN	NaN
chr9	21480100	21480420	279	PSN	3	0	21480313	0.682	21480419	0.274	-
chr19	1738093	1738413	280	PSN	2	0	1738188	0.691	1738313	0.386	-
chr20	46437117	46437437	281	PSN	1	1	46437298	0.719	46437117	0.138	+
chr20	23028048	23028368	282	PSN	0	1	23028180	0.872	23028048	0.258	+
chr20	28399497	28399817	283	PSN	2	3	28399728	0.862	28399497	0.161	-
chr1	25240573	25240893	284	PSN	3	0	NaN	NaN	NaN	NaN	NaN
chr23	10316934	10317254	285	PSN	1	3	10317110	0.838	10316981	0.203	+
chr6	18107713	18108033	286	PSN	1	0	18107723	0.755	18108027	0.421	+
chr17	33580155	33580475	287	PSN	0	1	33580365	0.489	33580471	0.225	-
chr3	43321291	43321611	288	PSN	2	0	43321606	0.767	43321359	0.352	-
chr6	31946470	31946790	289	PSN	0	2	31946654	0.816	31946548	0.34	+
chr9	8201055	8201375	290	PSN	1	0	8201162	0.738	8201055	0.253	+
chr9	23713590	23713910	291	PSN	3	0	23713667	0.735	23713762	0.406	+
chr22	12588604	12588924	292	PSN	1	0	NaN	NaN	NaN	NaN	NaN
chr3	41816754	41817074	293	PSN	2	0	41816754	0.39	41816860	0.136	-
chr14	18999344	18999664	294	PSN	0	0	18999512	0.735	18999344	0.0412	+
chr9	38972562	38972882	295	PSN	1	0	38972785	0.783	38972881	0.254	-
chr15	44795483	44795803	296	PSN	3	0	NaN	NaN	NaN	NaN	NaN
chr19	8586000	8586320	297	PSN	0	2	NaN	NaN	NaN	NaN	NaN
chr4	51831122	51831442	298	PSN	1	1	51831441	0.788	51831370	0.204	+
chr3	54185346	54185666	299	PSN	0	0	54185389	0.886	54185452	0.434	+
chr13	22444985	22445305	300	PSN	1	0	22445095	0.642	22445242	0.256	+
chr2	28273457	28273777	301	PSN	0	0	28273679	0.743	28273776	0.354	-
chr6	28594774	28595094	302	PSN	1	0	28594942	0.813	28594797	0.113	+
chr1	36213324	36213644	303	PSN	2	0	NaN	NaN	NaN	NaN	NaN
chr7	50037391	50037711	304	PSN	0	0	50037518	0.792	50037710	0.326	-
chr14	41505933	41506253	305	PSN	2	2	41506070	0.855	41506187	0.378	-
chr18	18115317	18115637	306	PSN	0	0	18115592	0.831	18115370	0.275	-
chr20	21747262	21747582	307	PSN	0	2	21747288	0.793	21747581	0.437	+
chr10	38824258	38824578	308	PSN	0	0	38824374	0.701	38824258	0.239	+
chr5	27753905	27754225	309	PSN	1	0	27754104	0.834	27754211	0.269	-
chr8	18025090	18025410	310	PSN	0	1	18025236	0.853	18025336	0.421	-
chr19	3732872	3733192	311	PSN	2	2	3733155	0.823	3732872	0.465	-
chr8	48795513	48795833	312	PSN	2	1	48795650	0.65	48795825	0.0723	-
chr5	24229207	24229527	313	PSN	1	2	24229315	0.775	24229411	0.499	-
chr15	16773397	16773717	314	PSN	2	1	16773533	0.708	16773709	0.12	-
chr16	26198156	26198476	315	PSN	2	1	26198288	0.72	26198433	0.164	-
chr19	28622969	28623289	316	PSN	0	1	28623230	0.795	28623133	0.52	-
chr14	41986440	41986760	317	PSN	0	1	41986608	0.803	41986462	0.139	+
chr20	5924817	5925137	318	PSN	1	0	NaN	NaN	NaN	NaN	NaN
chr5	32188239	32188559	319	PSN	0	2	32188268	0.724	32188558	0.302	+
chr23	26955376	26955696	320	PSN	2	0	26955557	0.827	26955410	0.382	+
chr12	23168135	23168455	321	PSN	1	0	23168454	0.779	23168135	0.096	-
chr2	27642297	27642617	322	PSN	0	1	27642406	0.791	27642316	0.484	+
chr17	19382056	19382376	323	PSN	2	0	19382336	0.802	19382118	0.425	-
chr23	17190701	17191021	324	PSN	1	0	17190907	0.849	17190701	0.216	+
chr7	52894025	52894345	325	PSN	2	0	52894048	0.689	52894343	0.172	+
chr7	31706393	31706713	326	PSN	0	1	31706500	0.882	31706393	0.358	+
chr16	39483238	39483558	327	PSN	1	0	39483301	0.611	39483247	0.369	+
chr24	13795072	13795392	328	PSN	0	4	13795324	0.758	13795104	0.384	+
chr15	33583994	33584314	329	PSN	1	0	33583994	0.901	33584286	0.226	+
chr23	3744939	3745259	330	PSN	0	0	3745049	0.941	3744939	0.0811	+
chr11	19156116	19156436	331	PSN	2	0	19156230	0.728	19156128	0.345	+
chr17	31197570	31197890	332	PSN	3	0	31197758	0.682	31197889	0.242	-
chr4	424349	424669	333	PSN	0	1	424636	0.818	424382	0.24	-
chr18	14928784	14929104	334	PSN	3	0	14928856	0.796	14928784	0.308	+
chr24	35441225	35441545	335	PSN	2	0	35441253	0.885	35441541	0.339	+
chr6	27693945	27694265	336	PSN	2	0	27694096	0.841	27694242	0.363	-
chr19	40931923	40932243	337	PSN	1	2	NaN	NaN	NaN	NaN	NaN
chr21	14130141	14130461	338	PSN	2	1	14130351	0.902	14130238	0.235	+
chr10	5276585	5276905	339	PSN	2	0	5276814	0.793	5276904	0.382	-
chr15	36922411	36922731	340	PSN	2	0	36922429	0.711	36922598	0.272	-
chr14	16772288	16772608	341	PSN	2	2	16772288	0.746	16772587	0.372	+
chr7	11620094	11620414	342	PSN	2	0	11620094	0.801	11620225	0.429	+
chr14	32879355	32879675	343	PSN	4	0	32879668	0.76	32879355	0.294	-
chr14	40337530	40337850	344	PSN	0	1	40337699	0.648	40337530	0.18	+
chr8	9466387	9466707	345	PSN	1	0	9466487	0.806	9466705	0.274	-
chr1	23730140	23730460	346	PSN	2	2	23730222	0.857	23730349	0.238	+
chr19	33281029	33281349	347	PSN	1	1	33281149	0.822	33281030	0.245	+
chr7	31569101	31569421	348	PSN	1	0	31569197	0.741	31569420	0.112	-
chr5	25746169	25746489	349	PSN	1	1	25746388	0.858	25746281	0.157	+
chr14	3048539	3048859	350	PSN	2	0	NaN	NaN	NaN	NaN	NaN
chr5	44583188	44583508	351	PSN	1	0	44583402	0.707	44583504	0.305	-
chr17	46673798	46674118	352	PSN	1	0	46674036	0.7	46673891	0.242	+
chr15	12202694	12203014	353	PSN	1	2	12202715	0.878	12202978	0.463	+
chr10	8443333	8443653	354	PSN	2	0	8443466	0.551	8443586	0.295	-
chr17	36042785	36043105	355	PSN	2	1	36042900	0.869	36042831	0.401	+
chr2	21771011	21771331	356	PSN	0	0	21771113	0.726	21771011	0.367	+
chr17	19237358	19237678	357	PSN	4	1	19237660	0.909	19237545	0.337	-
chr16	17811503	17811823	358	PSN	1	2	NaN	NaN	NaN	NaN	NaN
chr16	18383584	18383904	359	PSN	2	2	18383849	0.861	18383712	0.38	+
chr1	22124208	22124528	360	PSN	1	0	22124480	0.912	22124229	0.103	+
chr19	18442117	18442437	361	PSN	3	1	18442186	0.836	18442436	0.19	+
chr10	46370070	46370390	362	PSN	2	0	46370104	0.749	46370382	0.16	-
chr6	12839332	12839652	363	PSN	1	1	12839389	0.867	12839651	0.496	+
chr16	29565059	29565379	364	PSN	0	0	29565263	0.86	29565115	0.212	+
chr11	38548531	38548851	365	PSN	4	0	38548575	0.608	38548848	0.319	+
chr14	41603488	41603808	366	PSN	2	0	41603677	0.781	41603802	0.081	-
chr1	24955627	24955947	367	PSN	2	0	NaN	NaN	NaN	NaN	NaN
chr11	37023903	37024223	368	PSN	2	0	37023981	0.759	37024211	0.28	+
chr20	28120642	28120962	369	PSN	1	1	28120792	0.802	28120643	0.208	+
chr12	33866821	33867141	370	PSN	1	3	NaN	NaN	NaN	NaN	NaN
chr2	22847331	22847651	371	PSN	0	1	22847418	0.901	22847534	0.175	-
chr21	19385802	19386122	372	PSN	1	0	19385934	0.823	19385823	0.342	+
chr1	39579452	39579772	373	PSN	1	1	39579638	0.612	39579490	0.218	+
chr2	7359446	7359766	374	PSN	0	2	7359544	0.734	7359460	0.468	+
chr1	46074226	46074546	375	PSN	1	0	46074235	0.81	46074544	0.125	+
chr16	23641713	23642033	376	PSN	1	0	NaN	NaN	NaN	NaN	NaN
chr24	9273585	9273905	377	PSN	1	1	9273585	0.792	9273896	0.235	-
chr14	44394378	44394698	378	PSN	1	0	44394697	0.893	44394555	0.436	-
chr1	38581999	38582319	379	PSN	0	0	38582174	0.858	38582318	0.0627	-
chr3	60502599	60502919	380	PSN	0	3	60502805	0.89	60502602	0.264	+
chr19	19294383	19294703	381	PSN	3	0	19294560	0.8	19294702	0.159	-
chr19	26626135	26626455	382	PSN	2	0	26626185	0.627	26626323	0.266	-
chr14	18183654	18183974	383	PSN	2	3	18183875	0.676	18183654	0.289	-
chr1	46186967	46187287	384	PSN	0	2	46186996	0.857	46187051	0.464	+
chr10	43661002	43661322	385	PSN	0	1	43661162	0.881	43661064	0.312	+
chr5	3595424	3595744	386	PSN	4	1	3595556	0.785	3595424	0.261	+
chr4	27623430	27623750	387	PSN	1	1	27623573	0.82	27623433	0.279	+
chr21	11901815	11902135	388	PSN	0	2	11901980	0.899	11901815	0.118	+
chr3	7389748	7390068	389	PSN	2	1	7389986	0.876	7389889	0.321	-
chr5	41336054	41336374	390	PSN	1	1	41336192	0.685	41336338	0.364	-
chr20	30067229	30067549	391	PSN	1	0	30067421	0.828	30067548	0.218	-
chr19	44809084	44809404	392	PSN	3	1	NaN	NaN	NaN	NaN	NaN
chr5	42681238	42681558	393	PSN	2	1	42681327	0.897	42681238	0.287	+
chr8	53539528	53539848	394	PSN	1	2	NaN	NaN	NaN	NaN	NaN
chr14	42100248	42100568	395	PSN	1	0	42100372	0.811	42100507	0.286	-
chr20	27143823	27144143	396	PSN	2	0	27144091	0.665	27143825	0.291	-
chr6	29887901	29888221	397	PSN	0	1	29888220	0.824	29887901	0.267	+
chr4	13123586	13123906	398	PSN	1	0	13123651	0.809	13123746	0.428	+
chr6	31846954	31847274	399	PSN	1	0	31847265	0.903	31846967	0.371	-
chr6	37031277	37031597	400	PSN	0	0	37031314	0.785	37031593	0.115	+
chr6	12241063	12241383	401	PSN	0	0	NaN	NaN	NaN	NaN	NaN
chr17	15936401	15936721	402	PSN	3	0	15936442	0.75	15936582	0.348	+
chr3	35569275	35569595	403	PSN	4	0	NaN	NaN	NaN	NaN	NaN
chr21	5087134	5087454	404	PSN	0	0	NaN	NaN	NaN	NaN	NaN
chr16	27714598	27714918	405	PSN	0	1	27714598	0.807	27714863	0.474	-
chr19	21343108	21343428	406	PSN	2	0	21343256	0.533	21343127	0.12	+
chr15	26012427	26012747	407	PSN	2	0	26012594	0.621	26012427	0.337	+
chr20	20072647	20072967	408	PSN	0	2	20072783	0.917	20072966	0.201	-
chr19	26700298	26700618	409	PSN	0	1	26700490	0.871	26700605	0.192	-
chr15	40940265	40940585	410	PSN	1	1	40940398	0.813	40940265	0.385	+
chr8	54036697	54037017	411	PSN	0	1	54036740	0.817	54036932	0.48	+
chr7	43076180	43076500	412	PSN	0	2	NaN	NaN	NaN	NaN	NaN
chr23	39074194	39074514	413	PSN	1	0	NaN	NaN	NaN	NaN	NaN
chr7	57292510	57292830	414	PSN	3	1	57292602	0.671	57292510	0.378	+
chr17	31206955	31207275	415	PSN	4	0	31207070	0.933	31206966	0.3	+
chr25	23610729	23611049	416	PSN	1	0	NaN	NaN	NaN	NaN	NaN
chr3	45818439	45818759	417	PSN	0	0	45818639	0.791	45818487	0.346	+
chr21	13642542	13642862	418	PSN	1	2	13642576	0.61	13642722	0.348	-
chr1	14057491	14057811	419	PSN	1	0	14057676	0.787	14057775	0.319	-
chr1	4166197	4166517	420	PSN	1	0	4166295	0.778	4166404	0.538	-
chr6	26691121	26691441	421	PSN	1	0	26691234	0.854	26691381	0.329	-
chr24	20277012	20277332	422	PSN	0	1	20277203	0.9	20277012	0.257	-
chr2	17593244	17593564	423	PSN	0	0	17593259	0.926	17593323	0.28	+
chr21	9271125	9271445	424	PSN	1	0	9271187	0.713	9271343	0.191	-
chr1	23008419	23008739	425	PSN	1	0	23008646	0.899	23008488	0.06	+
chr7	26721222	26721542	426	PSN	3	2	26721538	0.815	26721285	0.234	-
chr11	20368274	20368594	427	PSN	2	0	20368296	0.699	20368358	0.48	+
chr7	23950798	23951118	428	PSN	0	2	23950943	0.716	23950799	0.138	+
chr20	8541669	8541989	429	PSN	2	0	8541985	0.745	8541669	0.32	-
chr4	20674514	20674834	430	PSN	1	0	20674722	0.864	20674515	0.142	+
chr4	12281631	12281951	431	PSN	2	1	12281904	0.811	12281631	0.242	-
chr22	8820390	8820710	432	PSN	3	4	8820458	0.792	8820709	0.364	+
chr24	19992913	19993233	433	PSN	2	0	19993015	0.866	19992920	0.291	+
chr13	35671168	35671488	434	PSN	0	0	NaN	NaN	NaN	NaN	NaN
chr17	44294384	44294704	435	PSN	1	0	NaN	NaN	NaN	NaN	NaN
chr14	32037963	32038283	436	PSN	1	0	32037963	0.806	32038282	0.122	+
chr14	33735644	33735964	437	PSN	0	0	33735843	0.911	33735961	0.379	-
chr16	18903431	18903751	438	PSN	1	0	18903739	0.934	18903622	0.286	-
chr11	40446852	40447172	439	PSN	2	0	NaN	NaN	NaN	NaN	NaN
chr17	17591786	17592106	440	PSN	2	1	17591908	0.795	17592007	0.317	+
chr23	28061475	28061795	441	PSN	1	0	28061565	0.834	28061716	0.421	+
chr23	28271175	28271495	442	PSN	1	0	28271404	0.831	28271290	0.288	-
chr8	22384523	22384843	443	PSN	3	0	NaN	NaN	NaN	NaN	NaN
chr15	44507430	44507750	444	PSN	4	1	NaN	NaN	NaN	NaN	NaN
chr25	32448517	32448837	445	PSN	0	0	32448517	0.833	32448836	0.138	-
chr3	15752795	15753115	446	PSN	3	0	15753026	0.676	15752797	0.199	-
chr6	55681399	55681719	447	PSN	1	0	NaN	NaN	NaN	NaN	NaN
chr9	16367250	16367570	448	PSN	1	1	NaN	NaN	NaN	NaN	NaN
chr6	56120365	56120685	449	PSN	2	0	56120491	0.707	56120682	0.371	-
chr24	14420434	14420754	450	PSN	1	1	14420454	0.852	14420747	0.435	+
chr23	19578467	19578787	451	PSN	1	1	19578567	0.831	19578786	0.409	+
chr11	30698665	30698985	452	PSN	1	0	30698861	0.775	30698683	0.34	-
chr15	16308688	16309008	453	PSN	1	1	16308921	0.727	16308738	0.0966	+
chr20	20602643	20602963	454	PSN	0	1	20602790	0.846	20602643	0.177	+
chr10	14933850	14934170	455	PSN	0	1	NaN	NaN	NaN	NaN	NaN
chr11	26741736	26742056	456	PSN	0	1	26741882	0.744	26741736	0.291	+
chr2	867807	868127	457	PSN	2	0	868025	0.708	867807	0.23	+
chr5	21867179	21867499	458	PSN	2	0	21867295	0.643	21867452	0.279	-
chr7	32791688	32792008	459	PSN	0	3	32791895	0.754	32791783	0.329	-
chr23	16851244	16851564	460	PSN	1	0	16851464	0.797	16851244	0.199	+
chr2	41961089	41961409	461	PSN	0	0	41961315	0.852	41961221	0.293	-
chr3	21826737	21827057	462	PSN	4	0	21826779	0.746	21826957	0.275	+
chr1	8533705	8534025	463	PSN	2	0	8533912	0.847	8533705	0.364	-
chr3	56613784	56614104	464	PSN	1	0	NaN	NaN	NaN	NaN	NaN
chr7	65863255	65863575	465	PSN	0	0	65863357	0.732	65863281	0.426	+
chr5	57928272	57928592	466	PSN	1	0	57928379	0.772	57928586	0.31	+
chr17	13740215	13740535	467	PSN	2	1	NaN	NaN	NaN	NaN	NaN
chr16	17777206	17777526	468	PSN	1	0	17777347	0.849	17777206	0.0943	+
chr7	57460264	57460584	469	PSN	1	2	57460391	0.881	57460468	0.445	-
chr11	30699082	30699402	470	PSN	0	2	30699354	0.783	30699200	0.371	+
chr1	47674268	47674588	471	PSN	0	2	47674409	0.84	47674499	0.465	-
chr8	33561367	33561687	472	PSN	2	1	33561507	0.642	33561646	0.234	+
chr7	66546580	66546900	473	PSN	1	1	66546765	0.804	66546899	0.436	-
chr3	10766029	10766349	474	PSN	1	1	10766215	0.769	10766048	0.188	+
chr1	47718729	47719049	475	PSN	0	0	47719044	0.883	47718901	0.461	-
chr20	46434544	46434864	476	PSN	2	1	46434646	0.744	46434546	0.245	+
chr2	37975555	37975875	477	PSN	1	1	37975711	0.777	37975612	0.393	+
chr7	27781092	27781412	478	PSN	0	1	27781270	0.721	27781144	0.381	+
chr11	29510972	29511292	479	PSN	1	1	29511143	0.89	29511242	0.242	-
chr2	48090913	48091233	480	PSN	1	0	48090921	0.771	48091232	0.249	+
chr11	24989133	24989453	481	PSN	0	1	24989375	0.743	24989181	0.21	+
chr23	19072272	19072592	482	PSN	0	0	19072448	0.787	19072591	0.537	-
chr25	32610687	32611007	483	PSN	1	0	32610903	0.871	32610712	0.261	+
chr10	18230973	18231293	484	PSN	4	2	18231107	0.716	18231292	0.28	+
chr3	36085731	36086051	485	PSN	4	1	36085914	0.868	36086042	0.226	-
chr5	71702555	71702875	486	PSN	0	1	71702793	0.942	71702697	0.332	-
chr16	39505300	39505620	487	PSN	1	0	39505550	0.816	39505405	0.433	-
chr25	15133946	15134266	488	PSN	0	1	15134137	0.628	15133993	0.107	+
chr4	12858658	12858978	489	PSN	0	0	12858900	0.868	12858820	0.453	-
chr8	31466082	31466402	490	PSN	1	2	31466229	0.666	31466082	0.384	+
chr2	32948564	32948884	491	PSN	1	1	32948883	0.676	32948646	0.264	-
chr14	38826654	38826974	492	PSN	0	1	38826825	0.912	38826689	0.13	+
chr5	25369399	25369719	493	PSN	0	1	25369470	0.755	25369562	0.163	+
chr15	24538969	24539289	494	PSN	0	0	24539190	0.877	24538970	0.227	+
chr12	41132660	41132980	495	PSN	1	0	NaN	NaN	NaN	NaN	NaN
chr9	29262222	29262542	496	PSN	0	0	29262376	0.847	29262280	0.4	+
chr7	18655742	18656062	497	PSN	2	0	18655935	0.691	18655788	0.109	+
chr24	13174078	13174398	498	PSN	1	0	13174242	0.795	13174081	0.275	+
chr16	9018227	9018547	499	PSN	1	4	NaN	NaN	NaN	NaN	NaN
chr10	20633057	20633377	500	PSN	0	2	NaN	NaN	NaN	NaN	NaN
chr6	23744460	23744780	501	PSN	1	1	23744605	0.808	23744460	0.0896	+
chr17	36064110	36064430	502	PSN	4	0	36064132	0.846	36064279	0.367	+
chr19	28617352	28617672	503	PSN	1	1	28617669	0.882	28617555	0.413	+
chr19	40061973	40062293	504	PSN	0	3	40062169	0.874	40062090	0.4	+
chr16	18398096	18398416	505	PSN	0	1	18398168	0.902	18398106	0.485	+
chr13	34771149	34771469	506	PSN	3	0	34771169	0.735	34771246	0.425	-
chr21	22914717	22915037	507	PSN	3	0	22914783	0.828	22914911	0.279	+
chr6	28953725	28954045	508	PSN	2	1	28953969	0.693	28953727	0.305	-
chr19	31041293	31041613	509	PSN	2	1	31041468	0.911	31041594	0.401	-
chr10	10217261	10217581	510	PSN	2	0	10217550	0.92	10217306	0.2	-
chr1	28811173	28811493	511	PSN	0	1	28811362	0.856	28811467	0.314	-
chr5	26540661	26540981	512	PSN	1	0	26540940	0.703	26540819	0.355	-
chr18	36409135	36409455	513	PSN	1	0	36409149	0.838	36409211	0.461	+
chr6	8820934	8821254	514	PSN	1	0	8821096	0.678	8821253	0.339	-
chr4	16096276	16096596	515	PSN	0	1	16096478	0.878	16096276	0.223	-
chr17	32885636	32885956	516	PSN	0	1	32885800	0.796	32885665	0.101	+
chr18	22054863	22055183	517	PSN	0	1	NaN	NaN	NaN	NaN	NaN
chr24	25460939	25461259	518	PSN	1	0	NaN	NaN	NaN	NaN	NaN
chr25	1688353	1688673	519	PSN	0	0	1688461	0.919	1688672	0.536	-
chr2	15267569	15267889	520	PSN	1	3	15267716	0.858	15267569	0.393	+
chr7	50846992	50847312	521	PSN	3	0	50847119	0.835	50847221	0.333	-
chr9	49772263	49772583	522	PSN	0	2	49772562	0.783	49772372	0.347	-
chr8	31961670	31961990	523	PSN	0	1	31961759	0.864	31961964	0.324	+
chr3	38527526	38527846	524	PSN	2	1	38527713	0.802	38527845	0.0479	-
chr21	13070520	13070840	525	PSN	2	2	13070754	0.869	13070638	0.193	+
chr12	38523974	38524294	526	PSN	1	0	NaN	NaN	NaN	NaN	NaN
chr4	16503851	16504171	527	PSN	2	0	16503942	0.766	16503858	0.506	+
chr20	32216630	32216950	528	PSN	0	1	32216845	0.737	32216650	0.144	+
chr1	47310270	47310590	529	PSN	3	0	47310582	0.857	47310299	0.171	+
chr19	36417173	36417493	530	PSN	2	1	36417263	0.75	36417178	0.489	+
chr7	35013827	35014147	531	PSN	0	0	35013887	0.837	35013964	0.305	+
chr4	7499046	7499366	532	PSN	0	0	7499107	0.864	7499365	0.223	+
chr4	14840573	14840893	533	PSN	0	1	14840600	0.799	14840724	0.49	-
chr19	35183827	35184147	534	PSN	1	0	35183940	0.879	35184064	0.447	-
chr1	5006814	5007134	535	PSN	2	0	5006971	0.85	5007116	0.0849	-
chr17	26563473	26563793	536	PSN	0	0	26563697	0.908	26563473	0.247	-
chr20	26448345	26448665	537	PSN	1	0	26448379	0.85	26448492	0.416	+
chr20	27783543	27783863	538	PSN	2	1	27783699	0.879	27783857	0.0246	-
chr5	63489491	63489811	539	PSN	1	0	63489550	0.888	63489805	0.452	+
chr9	19747884	19748204	540	PSN	0	1	19748009	0.882	19747904	0.498	+
chr19	28649510	28649830	541	PSN	0	2	28649645	0.779	28649568	0.309	+
chr3	21396895	21397215	542	PSN	1	2	21397021	0.768	21396907	0.268	+
chr21	12723072	12723392	543	PSN	1	0	12723098	0.749	12723342	0.389	+
chr1	38277810	38278130	544	PSN	1	1	NaN	NaN	NaN	NaN	NaN
chr18	45089042	45089362	545	PSN	1	2	NaN	NaN	NaN	NaN	NaN
chr23	20930056	20930376	546	PSN	1	0	20930192	0.787	20930340	0.255	-
chr21	38114790	38115110	547	PSN	1	2	38114897	0.761	38115016	0.433	-
chr3	26808936	26809256	548	PSN	0	1	26809223	0.791	26809103	0.41	-
chr20	26451815	26452135	549	PSN	1	0	26452017	0.733	26451835	0.404	+
chr1	39795917	39796237	550	PSN	0	2	39796210	0.9	39796130	0.311	-
chr10	46140865	46141185	551	PSN	2	1	46141015	0.718	46141155	0.279	-
chr23	37911188	37911508	552	PSN	1	0	37911284	0.658	37911188	0.286	+
chr8	29111988	29112308	553	PSN	1	1	29112230	0.696	29111988	0.0531	-
chr14	31663933	31664253	554	PSN	2	0	31664241	0.744	31664118	0.472	-
chr2	37078640	37078960	555	PSN	2	2	37078882	0.899	37078762	0.443	-
chr24	25530724	25531044	556	PSN	0	0	25530897	0.915	25530737	0.098	+
chr4	22986460	22986780	557	PSN	2	1	22986649	0.866	22986764	0.236	-
chr3	40578680	40579000	558	PSN	0	3	40578753	0.858	40578969	0.357	+
chr7	53102635	53102955	559	PSN	0	0	53102819	0.884	53102877	0.424	-
chr7	12788811	12789131	560	PSN	1	1	NaN	NaN	NaN	NaN	NaN
chr20	33369472	33369792	561	PSN	1	0	33369762	0.718	33369616	0.46	-
chr5	27720942	27721262	562	PSN	0	0	27721073	0.912	27721254	0.184	-
chr25	37402555	37402875	563	PSN	1	0	37402723	0.765	37402850	0.26	-
chr5	23840530	23840850	564	PSN	0	1	23840658	0.881	23840530	0.217	+
chr19	14886338	14886658	565	PSN	1	1	14886470	0.728	14886657	0.216	+
chr23	23604811	23605131	566	PSN	1	2	23605078	0.779	23604813	0.468	-
chr2	8226028	8226348	567	PSN	0	1	8226214	0.816	8226038	0.0758	+
chr10	43349119	43349439	568	PSN	0	0	43349404	0.88	43349278	0.361	+
chr17	33419265	33419585	569	PSN	1	1	33419421	0.747	33419302	0.285	+
chr23	2537120	2537440	570	PSN	2	1	2537439	0.757	2537315	0.191	+
chr13	14833902	14834222	571	PSN	0	0	14833910	0.79	14834218	0.369	-
chr20	25706947	25707267	572	PSN	0	0	25707213	0.742	25707146	0.447	+
chr9	56302065	56302385	573	PSN	1	0	NaN	NaN	NaN	NaN	NaN
chr8	3245553	3245873	574	PSN	1	0	3245872	0.781	3245766	0.409	+
chr17	8158040	8158360	575	PSN	1	2	8158311	0.788	8158215	0.255	-
chr18	16548423	16548743	576	PSN	0	0	16548511	0.898	16548624	0.466	+
chr11	11912643	11912963	577	PSN	1	0	11912668	0.937	11912769	0.403	-
chr7	14951834	14952154	578	PSN	1	1	NaN	NaN	NaN	NaN	NaN
chr7	13854819	13855139	579	PSN	0	0	13854895	0.852	13854819	0.368	+
chr5	67014779	67015099	580	PSN	1	0	67014888	0.693	67014779	0.29	+
chr21	36332224	36332544	581	PSN	1	1	36332282	0.718	36332520	0.31	+
chr2	41419561	41419881	582	PSN	4	0	NaN	NaN	NaN	NaN	NaN
chr6	50379468	50379788	583	PSN	2	0	50379787	0.891	50379495	0.21	+
chr7	35816539	35816859	584	PSN	2	0	NaN	NaN	NaN	NaN	NaN
chr6	44183268	44183588	585	PSN	0	0	44183526	0.89	44183283	0.206	+
chr11	19134295	19134615	586	PSN	1	2	19134545	0.84	19134295	0.326	+
chr2	30029987	30030307	587	PSN	1	0	30030060	0.784	30030301	0.434	+
chr2	33707925	33708245	588	PSN	0	1	33708106	0.795	33707980	0.36	+
chr7	43258800	43259120	589	PSN	3	1	43258963	0.745	43259118	0.294	-
chr25	13544829	13545149	590	PSN	4	1	13544918	0.756	13545148	0.337	+
chr13	12898797	12899117	591	PSN	1	1	12899038	0.869	12898941	0.26	-
chr4	13789088	13789408	592	PSN	0	0	13789284	0.86	13789128	0.105	+
chr7	25244794	25245114	593	PSN	2	0	25244898	0.871	25244794	0.211	+
chr8	22742358	22742678	594	PSN	0	0	22742379	0.796	22742496	0.35	+
chr13	30544131	30544451	595	PSN	2	1	30544198	0.94	30544450	0.241	+
chr2	29798403	29798723	596	PSN	0	0	29798499	0.846	29798633	0.411	-
chr19	26441770	26442090	597	PSN	2	0	26441874	0.676	26442020	0.154	-
chr19	32118373	32118693	598	PSN	1	0	NaN	NaN	NaN	NaN	NaN
chr14	49581389	49581709	599	PSN	1	0	NaN	NaN	NaN	NaN	NaN
chr3	32466120	32466440	600	PSN	2	2	32466137	0.747	32466387	0.435	+
chr19	10405513	10405833	601	PSN	1	1	10405736	0.682	10405571	0.046	+
chr19	29399224	29399544	602	PSN	1	0	29399338	0.853	29399484	0.557	+
chr3	22154419	22154739	603	PSN	2	0	22154556	0.611	22154684	0.223	+
chr17	33494911	33495231	604	PSN	0	1	33495145	0.915	33495230	0.551	-
chr15	44456105	44456425	605	PSN	1	2	NaN	NaN	NaN	NaN	NaN
chr9	223861	224181	606	PSN	2	0	224072	0.807	223901	0.19	-
chr4	6800427	6800747	607	PSN	2	0	6800437	0.845	6800540	0.496	+
chr19	40382130	40382450	608	PSN	0	2	40382286	0.883	40382130	0.103	+
chr2	53060529	53060849	609	PSN	0	2	53060729	0.861	53060594	0.363	+
chr6	43228929	43229249	610	PSN	1	0	43229035	0.688	43228929	0.255	+
chr16	51256247	51256567	611	PSN	1	1	51256442	0.649	51256249	0.183	-
chr5	64673762	64674082	612	PSN	0	2	64674010	0.53	64673820	0.109	-
chr9	3037214	3037534	613	PSN	0	1	3037533	0.693	3037365	0.306	+
chr3	33373925	33374245	614	PSN	2	1	33373958	0.857	33374238	0.338	+
chr7	35016858	35017178	615	PSN	1	0	35016959	0.766	35017107	0.266	-
chr6	13968073	13968393	616	PSN	0	2	13968173	0.844	13968357	0.505	-
chr16	8734374	8734694	617	PSN	1	0	8734514	0.882	8734675	0.56	-
chr16	28991377	28991697	618	PSN	1	1	28991634	0.817	28991377	0.174	-
chr16	42304684	42305004	619	PSN	1	0	42304830	0.875	42304685	0.2	+
chr18	2895228	2895548	620	PSN	1	1	NaN	NaN	NaN	NaN	NaN
chr5	46111332	46111652	621	PSN	1	0	46111381	0.877	46111508	0.473	+
chr7	20820536	20820856	622	PSN	1	0	20820685	0.699	20820539	0.219	+
chr11	2378834	2379154	623	PSN	1	1	2379033	0.743	2378914	0.371	+
chr11	18520307	18520627	624	PSN	1	0	18520502	0.752	18520340	0.1	+
chr7	50741156	50741476	625	PSN	0	1	50741259	0.732	50741397	0.414	+
chr16	51519530	51519850	626	PSN	1	1	51519698	0.865	51519846	0.225	-
chr1	25795636	25795956	627	PSN	0	0	NaN	NaN	NaN	NaN	NaN
chr7	48353253	48353573	628	PSN	1	2	48353328	0.77	48353572	0.354	+
chr7	55937999	55938319	629	PSN	0	3	55938204	0.793	55938318	0.262	-
chr18	37254555	37254875	630	PSN	0	0	37254772	0.749	37254559	0.389	-
chr23	17940645	17940965	631	PSN	3	0	17940778	0.731	17940645	0.34	+
chr14	6946303	6946623	632	PSN	0	0	NaN	NaN	NaN	NaN	NaN
chr16	31800647	31800967	633	PSN	0	0	31800754	0.825	31800659	0.53	+
chr19	28808638	28808958	634	PSN	1	2	28808638	0.614	28808898	0.398	+
chr18	19954316	19954636	635	PSN	2	1	19954632	0.838	19954359	0.523	-
chr19	32119931	32120251	636	PSN	1	0	32120110	0.836	32120250	0.283	-
chr17	34971111	34971431	637	PSN	1	0	34971420	0.964	34971173	0.308	-
chr17	50243823	50244143	638	PSN	4	1	50243967	0.717	50244114	0.515	-
chr11	43726672	43726992	639	PSN	1	0	43726718	0.786	43726817	0.436	+
chr10	10285138	10285458	640	PSN	1	1	10285247	0.84	10285139	0.541	+
chr12	40005350	40005670	641	PSN	0	2	40005651	0.88	40005350	0.288	+
chr7	45708838	45709158	642	PSN	0	1	45708913	0.887	45708838	0.482	+
chr4	8068361	8068681	643	PSN	0	2	8068468	0.939	8068673	0.22	+
chr1	36509550	36509870	644	PSN	2	1	36509629	0.774	36509734	0.417	-
chr24	21806022	21806342	645	PSN	1	0	21806022	0.649	21806337	0.391	+
chr13	54054225	54054545	646	PSN	0	1	NaN	NaN	NaN	NaN	NaN
chr8	32217211	32217531	647	PSN	1	1	NaN	NaN	NaN	NaN	NaN
chr2	18763575	18763895	648	PSN	2	0	18763892	0.797	18763608	0.188	-
chr15	28730826	28731146	649	PSN	0	1	28730951	0.851	28730826	0.394	+
chr20	38553729	38554049	650	PSN	1	1	38553813	0.858	38553950	0.197	+
chr6	36397930	36398250	651	PSN	1	2	36398183	0.715	36397962	0.371	-
chr5	55239718	55240038	652	PSN	0	0	55239938	0.77	55239718	0.103	-
chr7	57187397	57187717	653	PSN	2	3	57187430	0.889	57187716	0.331	+
chr7	34534781	34535101	654	PSN	2	1	34535022	0.739	34534814	0.431	-
chr13	17087039	17087359	655	PSN	2	1	17087299	0.794	17087217	0.574	-
chr14	5569272	5569592	656	PSN	0	2	5569335	0.864	5569454	0.378	-
chr8	34148117	34148437	657	PSN	1	2	34148200	0.809	34148117	0.322	+
chr8	20980259	20980579	658	PSN	0	0	20980508	0.81	20980259	0.345	-
chr13	20639684	20640004	659	PSN	1	0	NaN	NaN	NaN	NaN	NaN
chr15	29621528	29621848	660	PSN	1	0	29621556	0.761	29621847	0.392	+
chr3	24349545	24349865	661	PSN	1	1	24349621	0.74	24349850	0.406	+
chr11	45400942	45401262	662	PSN	1	0	NaN	NaN	NaN	NaN	NaN
chr20	34568534	34568854	663	PSN	1	1	34568534	0.879	34568623	0.255	+
chr23	18665283	18665603	664	PSN	2	2	18665565	0.594	18665309	0.334	-
chr15	10634515	10634835	665	PSN	1	0	NaN	NaN	NaN	NaN	NaN
chr13	31867983	31868303	666	PSN	0	1	31868117	0.86	31867986	0.375	+
chr1	12181039	12181359	667	PSN	0	3	NaN	NaN	NaN	NaN	NaN
chr10	45810546	45810866	668	PSN	2	0	NaN	NaN	NaN	NaN	NaN
chr18	44764537	44764857	669	PSN	2	1	44764625	0.875	44764537	0.29	+
chr14	31417293	31417613	670	PSN	0	0	NaN	NaN	NaN	NaN	NaN
chr2	37759421	37759741	671	PSN	1	0	37759658	0.854	37759421	0.0979	-
chr2	25390872	25391192	672	PSN	0	1	25391014	0.658	25391149	0.109	-
chr6	1727484	1727804	673	PSN	3	1	NaN	NaN	NaN	NaN	NaN
chr4	20361838	20362158	674	PSN	1	2	20361991	0.848	20361853	0.235	+
chr15	32797234	32797554	675	PSN	1	1	32797351	0.82	32797553	0.266	+
chr14	30770204	30770524	676	PSN	0	0	30770389	0.728	30770244	0.253	+
chr5	27860902	27861222	677	PSN	0	2	27861087	0.688	27860902	0.27	-
chr19	15283298	15283618	678	PSN	2	1	15283361	0.809	15283596	0.383	+
chr7	48389815	48390135	679	PSN	0	0	48389906	0.738	48390132	0.239	+
chr23	6881994	6882314	680	PSN	3	1	6882286	0.818	6882190	0.334	-
chr5	64556318	64556638	681	PSN	2	1	NaN	NaN	NaN	NaN	NaN
chr15	6907222	6907542	682	PSN	0	1	6907379	0.8	6907522	0.149	-
chr5	32186131	32186451	683	PSN	3	2	32186418	0.541	32186325	0.227	-
chr24	43851049	43851369	684	PSN	1	1	NaN	NaN	NaN	NaN	NaN
chr6	55628250	55628570	685	PSN	1	1	55628276	0.795	55628563	0.193	+
chr5	21485390	21485710	686	PSN	0	1	21485427	0.777	21485700	0.573	+
chr19	12852586	12852906	687	PSN	0	0	12852644	0.89	12852905	0.447	+
chr18	14280386	14280706	688	PSN	2	0	14280563	0.64	14280418	0.281	+
chr13	9819639	9819959	689	PSN	1	0	NaN	NaN	NaN	NaN	NaN
chr20	166362	166682	690	PSN	2	0	166418	0.904	166506	0.49	-
chr9	3529243	3529563	691	PSN	4	0	3529434	0.752	3529255	0.184	+
chr25	37379264	37379584	692	PSN	1	0	37379583	0.822	37379270	0.244	+
chr20	8194885	8195205	693	PSN	1	1	NaN	NaN	NaN	NaN	NaN
chr5	67377802	67378122	694	PSN	1	0	67377894	0.789	67378121	0.371	-
chr17	25027565	25027885	695	PSN	1	0	25027742	0.815	25027565	0.326	-
chr17	29070415	29070735	696	PSN	1	2	29070520	0.734	29070734	0.376	-
chr7	53105317	53105637	697	PSN	1	1	53105422	0.867	53105555	0.15	+
chr5	54807734	54808054	698	PSN	2	0	54807792	0.742	54807930	0.44	-
chr8	16881448	16881768	699	PSN	1	0	16881462	0.917	16881767	0.23	+
chr10	46348070	46348390	700	PSN	0	1	46348246	0.878	46348367	0.381	-
chr6	6905624	6905944	701	PSN	2	0	6905723	0.68	6905624	0.268	+
chr22	40336975	40337295	702	PSN	3	0	NaN	NaN	NaN	NaN	NaN
chr22	11067903	11068223	703	PSN	0	0	11068175	0.89	11067906	0.207	+
chr9	47640163	47640483	704	PSN	2	0	47640441	0.788	47640323	0.442	+
chr7	33112855	33113175	705	PSN	1	0	33112886	0.706	33113173	0.281	+
chr21	18889260	18889580	706	PSN	0	0	18889284	0.763	18889458	0.452	+
chr19	36128191	36128511	707	PSN	2	4	36128278	0.78	36128423	0.299	-
chr19	32589870	32590190	708	PSN	0	0	32590082	0.887	32589870	0.0501	+
chr2	7584003	7584323	709	PSN	1	1	7584159	0.925	7584281	0.231	-
chr9	47630147	47630467	710	PSN	1	0	47630222	0.854	47630359	0.368	+
chr20	40357495	40357815	711	PSN	2	0	40357655	0.93	40357495	0.0964	+
chr17	50165706	50166026	712	PSN	0	0	50165884	0.839	50165706	0.452	+
chr24	7075999	7076319	713	PSN	1	2	7076104	0.881	7075999	0.483	+
chr24	24432656	24432976	714	PSN	0	2	24432855	0.895	24432656	0.0904	+
chr12	26334781	26335101	715	PSN	2	0	26335013	0.871	26334781	0.473	-
chr20	43319141	43319461	716	PSN	0	0	43319444	0.871	43319163	0.101	+
chr6	32827959	32828279	717	PSN	0	0	32828155	0.725	32827959	0.264	+
chr8	14036125	14036445	718	PSN	1	0	14036373	0.884	14036248	0.509	-
chr8	31294857	31295177	719	PSN	1	1	31295123	0.881	31295176	0.225	-
chr9	13043957	13044277	720	PSN	1	0	13044102	0.924	13044003	0.314	+
chr1	24227590	24227910	721	PSN	0	1	24227876	0.914	24227801	0.285	-
chr3	40544635	40544955	722	PSN	0	0	40544884	0.936	40544954	0.477	-
chr19	30991434	30991754	723	PSN	3	0	30991630	0.812	30991712	0.307	-
chr13	18553228	18553548	724	PSN	0	1	18553359	0.872	18553228	0.173	+
chr11	19161165	19161485	725	PSN	3	2	19161361	0.822	19161484	0.366	-
chr11	45522333	45522653	726	PSN	0	0	45522524	0.831	45522355	0.0467	+
chr6	55628648	55628968	727	PSN	4	1	55628967	0.801	55628862	0.337	+
chr3	62980065	62980385	728	PSN	0	3	62980249	0.9	62980375	0.343	-
chr6	16198820	16199140	729	PSN	2	0	16198927	0.854	16199104	0.332	-
chr1	42963629	42963949	730	PSN	0	0	42963924	0.719	42963686	0.349	+
chr14	10802736	10803056	731	PSN	1	1	10802805	0.716	10802905	0.404	+
chr11	25936475	25936795	732	PSN	2	2	25936498	0.788	25936794	0.087	+
chr1	28825770	28826090	733	PSN	2	1	28826046	0.924	28825770	0.283	-
chr2	18762262	18762582	734	PSN	0	1	NaN	NaN	NaN	NaN	NaN
chr9	17953703	17954023	735	PSN	1	0	17953734	0.727	17954011	0.43	+
chr18	24516866	24517186	736	PSN	2	0	24517092	0.746	24516866	0.453	-
chr20	30827131	30827451	737	PSN	0	0	30827252	0.725	30827131	0.197	+
chr4	20065289	20065609	738	PSN	3	1	20065384	0.825	20065476	0.317	+
chr17	38495249	38495569	739	PSN	1	0	38495408	0.654	38495264	0.117	+
chr13	10081960	10082280	740	PSN	2	1	10081960	0.764	10082022	0.469	+
chr14	13064268	13064588	741	PSN	0	0	13064345	0.847	13064458	0.288	-
chr1	5028025	5028345	742	PSN	3	1	5028196	0.591	5028025	0.137	+
chr3	36365440	36365760	743	PSN	0	0	36365662	0.92	36365759	0.318	-
chr10	32419902	32420222	744	PSN	1	0	32419929	0.888	32420059	0.484	+
chr6	39926056	39926376	745	PSN	2	1	39926296	0.78	39926180	0.275	-
chr5	71785001	71785321	746	PSN	0	0	71785223	0.829	71785320	0.192	-
chr6	11727372	11727692	747	PSN	0	0	11727639	0.888	11727398	0.304	-
chr19	6761022	6761342	748	PSN	0	0	6761251	0.828	6761022	0.161	-
chr24	27174864	27175184	749	PSN	1	1	27174968	0.771	27174864	0.18	+
chr2	15233577	15233897	750	PSN	2	0	15233604	0.797	15233687	0.467	+
chr7	39435509	39435829	751	PSN	2	0	39435775	0.812	39435729	0.438	-
chr4	11839902	11840222	752	PSN	2	0	11840200	0.652	11839916	0.143	-
chr17	41578400	41578720	753	PSN	1	1	41578404	0.808	41578719	0.413	+
chr17	41614087	41614407	754	PSN	2	2	41614210	0.598	41614352	0.0941	-
chr18	26467845	26468165	755	PSN	0	2	26467887	0.759	26468162	0.231	+
chr1	9283628	9283948	756	PSN	1	1	9283628	0.794	9283745	0.349	-
chr4	12861196	12861516	757	PSN	1	1	12861340	0.698	12861196	0.21	+
chr2	21411485	21411805	758	PSN	2	1	21411552	0.833	21411804	0.363	-
chr8	10915539	10915859	759	PSN	0	1	NaN	NaN	NaN	NaN	NaN
chr19	23009514	23009834	760	PSN	0	0	23009518	0.756	23009733	0.445	-
chr18	43607385	43607705	761	PSN	1	0	NaN	NaN	NaN	NaN	NaN
chr24	18167195	18167515	762	PSN	0	4	18167514	0.786	18167195	0.165	-
chr1	27467316	27467636	763	PSN	1	1	27467497	0.72	27467634	0.208	-
chr8	49313059	49313379	764	PSN	3	1	49313239	0.824	49313138	0.434	+
chr17	27127734	27128054	765	PSN	0	3	27128035	0.71	27127837	0.372	+
chr25	19087156	19087476	766	PSN	1	3	19087247	0.73	19087404	0.162	-
chr3	24409914	24410234	767	PSN	0	0	24410102	0.839	24409978	0.422	+
chr1	21442168	21442488	768	PSN	0	0	21442232	0.841	21442365	0.402	-
chr11	19401832	19402152	769	PSN	1	1	19402088	0.78	19401909	0.431	+
chr3	26459860	26460180	770	PSN	1	1	26459860	0.713	26460116	0.318	-
chr6	36400722	36401042	771	PSN	1	1	36400756	0.81	36401036	0.268	+
chr3	25081235	25081555	772	PSN	0	0	25081343	0.836	25081554	0.0941	+
chr21	9472904	9473224	773	PSN	0	1	9473143	0.761	9473017	0.216	-
chr22	21938149	21938469	774	PSN	2	1	21938346	0.932	21938208	0.187	+
chr17	42022652	42022972	775	PSN	2	1	42022852	0.903	42022897	0.404	-
chr13	39684283	39684603	776	PSN	0	1	39684579	0.851	39684309	0.0888	+
chr6	28952253	28952573	777	PSN	1	3	28952419	0.59	28952269	0.223	+
chr8	14695926	14696246	778	PSN	1	0	14696059	0.874	14695926	0.0631	+
chr23	17922586	17922906	779	PSN	1	1	17922868	0.809	17922743	0.374	-
chr11	7701105	7701425	780	PSN	1	2	NaN	NaN	NaN	NaN	NaN
chr6	13354347	13354667	781	PSN	2	0	NaN	NaN	NaN	NaN	NaN
chr4	27640423	27640743	782	PSN	2	0	27640601	0.809	27640729	0.332	-
chr13	22423016	22423336	783	PSN	2	1	22423233	0.872	22423331	0.264	-
chr21	36509806	36510126	784	PSN	3	0	36509998	0.888	36509825	0.326	+
chr20	30883611	30883931	785	PSN	0	2	30883832	0.944	30883721	0.296	+
chr13	14843605	14843925	786	PSN	1	4	14843772	0.687	14843727	0.525	+
chr7	54647495	54647815	787	PSN	1	1	54647598	0.574	54647811	0.272	+
chr2	27669362	27669682	788	PSN	0	0	27669448	0.842	27669523	0.455	+
chr23	31030520	31030840	789	PSN	1	0	31030708	0.847	31030832	0.291	-
chr15	26281298	26281618	790	PSN	2	0	26281459	0.928	26281314	0.11	+
chr14	31779113	31779433	791	PSN	0	1	31779252	0.809	31779126	0.235	+
chr20	32803458	32803778	792	PSN	1	0	32803741	0.897	32803458	0.452	-
chr9	52845885	52846205	793	PSN	2	0	52845939	0.812	52846044	0.396	-
chr16	29420953	29421273	794	PSN	2	0	29421084	0.896	29420977	0.488	+
chr6	28590111	28590431	795	PSN	2	0	28590336	0.824	28590113	0.317	-
chr4	18545360	18545680	796	PSN	0	1	18545678	0.616	18545576	0.311	+
chr9	13071461	13071781	797	PSN	2	0	13071480	0.75	13071764	0.339	+
chr4	3330137	3330457	798	PSN	1	1	3330279	0.811	3330137	0.0225	+
chr20	38987879	38988199	799	PSN	0	1	38988116	0.862	38987974	0.555	+
chr14	32850852	32851172	800	PSN	2	0	32851026	0.742	32851119	0.535	-
chr9	54931523	54931843	801	PSN	0	1	NaN	NaN	NaN	NaN	NaN
chr1	16599092	16599412	802	PSN	2	2	16599255	0.785	16599092	0.088	+
chr10	39490590	39490910	803	PSN	0	1	NaN	NaN	NaN	NaN	NaN
chr21	30723469	30723789	804	PSN	2	0	30723768	0.769	30723682	0.407	-
chr1	8455223	8455543	805	PSN	0	2	8455433	0.801	8455229	0.173	-
chr5	54806689	54807009	806	PSN	0	0	54806769	0.828	54806916	0.482	-
chr8	20659393	20659713	807	PSN	0	0	20659524	0.761	20659404	0.257	+
chr23	28056944	28057264	808	PSN	0	1	28057139	0.842	28056944	0.571	-
chr11	27325071	27325391	809	PSN	1	0	27325362	0.819	27325236	0.296	+
chr11	22696354	22696674	810	PSN	0	0	22696563	0.679	22696354	0.334	-
chr2	9988054	9988374	811	PSN	1	0	NaN	NaN	NaN	NaN	NaN
chr21	36271841	36272161	812	PSN	1	1	36272012	0.707	36271845	0.335	+
chr15	44459471	44459791	813	PSN	1	0	NaN	NaN	NaN	NaN	NaN
chr7	52559861	52560181	814	PSN	0	2	52559975	0.876	52560111	0.198	-
chr8	18032822	18033142	815	PSN	0	3	18033078	0.802	18032972	0.516	-
chr16	39639357	39639677	816	PSN	1	2	39639644	0.783	39639357	0.267	+
chr18	24701247	24701567	817	PSN	0	0	24701521	0.812	24701395	0.339	-
chr13	29950357	29950677	818	PSN	2	1	29950484	0.792	29950676	0.381	-
chr8	32217741	32218061	819	PSN	1	2	32217814	0.842	32217923	0.523	+
chr17	23140278	23140598	820	PSN	2	0	23140392	0.862	23140278	0.266	+
chr13	22739017	22739337	821	PSN	1	0	22739301	0.868	22739159	0.451	+
chr19	21401830	21402150	822	PSN	1	0	21401837	0.866	21401960	0.282	+
chr23	25706423	25706743	823	PSN	0	2	25706708	0.848	25706424	0.309	-
chr16	39470462	39470782	824	PSN	3	0	39470573	0.795	39470781	0.211	-
chr3	34755170	34755490	825	PSN	0	1	34755321	0.847	34755170	0.0531	+
chr9	44164139	44164459	826	PSN	1	1	44164453	0.717	44164359	0.219	+
chr3	34835240	34835560	827	PSN	0	0	34835351	0.943	34835240	0.256	+
chr2	26862709	26863029	828	PSN	1	0	NaN	NaN	NaN	NaN	NaN
chr2	48344845	48345165	829	PSN	1	0	48345091	0.945	48345033	0.452	-
chr12	14832315	14832635	830	PSN	0	0	14832462	0.885	14832515	0.342	-
chr21	15671830	15672150	831	PSN	1	0	15672106	0.835	15671972	0.251	+
chr10	37845066	37845386	832	PSN	1	3	37845226	0.941	37845067	0.0567	+
chr10	36005996	36006316	833	PSN	0	0	36006177	0.866	36006036	0.158	+
chr22	11251634	11251954	834	PSN	0	4	11251844	0.864	11251932	0.393	-
chr24	3247984	3248304	835	PSN	4	0	3248220	0.626	3248303	0.353	-
chr3	54192147	54192467	836	PSN	1	0	54192147	0.896	54192334	0.557	+
chr7	44454102	44454422	837	PSN	1	1	44454213	0.776	44454102	0.153	+
chr8	18032293	18032613	838	PSN	1	0	18032404	0.78	18032293	0.538	+
chr20	37236178	37236498	839	PSN	2	2	37236476	0.631	37236178	0.0409	-
chr7	70308807	70309127	840	PSN	1	1	70308858	0.89	70309126	0.288	+
chr9	22253605	22253925	841	PSN	2	0	22253679	0.605	22253924	0.323	-
chr1	8358888	8359208	842	PSN	0	0	8358918	0.858	8359064	0.464	+
chr23	39039210	39039530	843	PSN	1	1	NaN	NaN	NaN	NaN	NaN
chr24	36888706	36889026	844	PSN	1	3	36888857	0.534	36889004	0.0744	-
chr6	7095768	7096088	845	PSN	0	1	NaN	NaN	NaN	NaN	NaN
chr21	44178717	44179037	846	PSN	0	0	NaN	NaN	NaN	NaN	NaN
chr6	57608611	57608931	847	PSN	2	0	NaN	NaN	NaN	NaN	NaN
chr13	19374368	19374688	848	PSN	0	1	19374500	0.719	19374644	0.333	-
chr14	38481428	38481748	849	PSN	1	4	NaN	NaN	NaN	NaN	NaN
chr7	45304780	45305100	850	PSN	2	0	45305071	0.785	45304921	0.456	-
chr5	45803898	45804218	851	PSN	0	1	45804104	0.762	45803899	0.225	+
chr23	26315775	26316095	852	PSN	1	1	26315956	0.669	26315776	0.234	+
chr14	38824829	38825149	853	PSN	3	0	38824987	0.799	38825141	0.273	-
chr3	36119295	36119615	854	PSN	0	1	36119345	0.876	36119423	0.388	+
chr22	12183572	12183892	855	PSN	2	0	12183700	0.859	12183591	0.353	+
chr15	19430471	19430791	856	PSN	0	0	19430733	0.865	19430610	0.377	-
chr1	44184815	44185135	857	PSN	2	1	44184965	0.465	44185110	0.15	-
chr23	27029825	27030145	858	PSN	1	0	27029986	0.839	27030144	0.1	-
chr7	44803212	44803532	859	PSN	0	1	44803311	0.852	44803531	0.208	+
chr7	47402812	47403132	860	PSN	2	1	NaN	NaN	NaN	NaN	NaN
chr6	29433214	29433534	861	PSN	0	1	NaN	NaN	NaN	NaN	NaN
chr23	27098216	27098536	862	PSN	1	1	27098535	0.708	27098468	0.347	+
chr23	19525105	19525425	863	PSN	0	0	19525270	0.706	19525397	0.448	-
chr7	55968324	55968644	864	PSN	1	0	55968342	0.872	55968641	0.455	+
chr6	11678684	11679004	865	PSN	3	2	NaN	NaN	NaN	NaN	NaN
chr5	48083301	48083621	866	PSN	2	0	48083471	0.765	48083592	0.207	-
chr14	44716565	44716885	867	PSN	3	1	44716722	0.707	44716795	0.342	-
chr21	19739839	19740159	868	PSN	0	1	19740074	0.825	19739986	0.265	-
chr5	46935851	46936171	869	PSN	2	0	NaN	NaN	NaN	NaN	NaN
chr5	55246793	55247113	870	PSN	0	1	55246971	0.866	55246793	0.0283	+
chr5	69158890	69159210	871	PSN	1	0	69159024	0.815	69158890	0.273	+
chr13	17061569	17061889	872	PSN	2	1	17061790	0.877	17061888	0.472	-
chr15	32348641	32348961	873	PSN	0	0	32348792	0.797	32348937	0.171	-
chr17	23186243	23186563	874	PSN	0	0	23186535	0.879	23186451	0.46	-
chr19	36539937	36540257	875	PSN	2	1	NaN	NaN	NaN	NaN	NaN
chr12	36591999	36592319	876	PSN	2	0	36592315	0.699	36592001	0.145	-
chr13	39685918	39686238	877	PSN	0	0	NaN	NaN	NaN	NaN	NaN
chr9	12356941	12357261	878	PSN	2	2	12357167	0.668	12357257	0.386	-
chr23	36228487	36228807	879	PSN	0	0	36228634	0.895	36228512	0.0938	+
chr3	42034863	42035183	880	PSN	0	2	NaN	NaN	NaN	NaN	NaN
chr11	14565760	14566080	881	PSN	0	2	14565931	0.816	14566079	0.27	-
chr3	25287085	25287405	882	PSN	1	1	25287178	0.774	25287404	0.287	+
chr20	17792578	17792898	883	PSN	1	0	17792891	0.799	17792811	0.307	-
chr14	38427090	38427410	884	PSN	2	1	38427279	0.871	38427163	0.355	+
chr13	20638790	20639110	885	PSN	0	0	NaN	NaN	NaN	NaN	NaN
chr14	38886112	38886432	886	PSN	1	1	38886228	0.77	38886375	0.426	+
chr17	12758572	12758892	887	PSN	1	0	12758590	0.876	12758888	0.341	+
chr13	27158778	27159098	888	PSN	0	0	27158969	0.853	27159096	0.268	-
chr11	28171641	28171961	889	PSN	0	0	28171746	0.53	28171656	0.279	+
chr7	6755673	6755993	890	PSN	0	0	6755687	0.836	6755976	0.633	+
chr9	29147979	29148299	891	PSN	0	0	NaN	NaN	NaN	NaN	NaN
chr15	22401176	22401496	892	PSN	2	1	22401311	0.668	22401478	0.262	-
chr12	44285162	44285482	893	PSN	2	0	44285472	0.936	44285364	0.375	-
chr23	5028957	5029277	894	PSN	0	3	NaN	NaN	NaN	NaN	NaN
chr12	48551331	48551651	895	PSN	1	0	NaN	NaN	NaN	NaN	NaN
chr19	30799749	30800069	896	PSN	2	0	30799896	0.859	30800032	0.336	-
chr19	15269759	15270079	897	PSN	0	0	15269833	0.894	15269910	0.513	+
chr6	43211177	43211497	898	PSN	0	0	43211404	0.818	43211496	0.35	-
chr16	8950206	8950526	899	PSN	2	1	8950419	0.784	8950519	0.379	-
chr11	31274570	31274890	900	PSN	2	1	31274691	0.717	31274875	0.336	-
chr2	16384955	16385275	901	PSN	0	1	16384986	0.86	16385274	0.249	+
chr5	39376181	39376501	902	PSN	0	1	39376327	0.925	39376465	0.346	-
chr8	49087282	49087602	903	PSN	1	0	49087565	0.835	49087365	0.0832	+
chr21	36936993	36937313	904	PSN	0	1	36937253	0.852	36936993	0.471	-
chr6	18056031	18056351	905	PSN	2	1	18056031	0.88	18056350	0.376	+
chr5	45285472	45285792	906	PSN	2	0	NaN	NaN	NaN	NaN	NaN
chr5	35690927	35691247	907	PSN	1	1	35691096	0.705	35690944	0.19	+
chr13	16398536	16398856	908	PSN	0	1	16398776	0.856	16398536	0.434	-
chr1	25583504	25583824	909	PSN	1	3	25583718	0.816	25583603	0.515	+
chr18	14741808	14742128	910	PSN	0	1	14742032	0.861	14741924	0.378	-
chr16	32421464	32421784	911	PSN	3	0	NaN	NaN	NaN	NaN	NaN
chr13	31030131	31030451	912	PSN	1	2	31030208	0.837	31030131	0.462	+
chr13	41980983	41981303	913	PSN	1	2	41981213	0.746	41981126	0.328	-
chr21	41609550	41609870	914	PSN	1	0	41609810	0.899	41609550	0.228	-
chr6	22330789	22331109	915	PSN	0	0	22330923	0.818	22330789	0.294	+
chr21	15563562	15563882	916	PSN	2	0	15563686	0.634	15563562	0.278	+
chr20	33646584	33646904	917	PSN	2	1	33646652	0.712	33646798	0.47	+
chr14	21380101	21380421	918	PSN	0	0	21380323	0.854	21380106	0.244	+
chr21	17950282	17950602	919	PSN	0	1	17950460	0.863	17950572	0.373	-
chr18	38025906	38026226	920	PSN	1	1	38026082	0.734	38026219	0.229	-
chr13	2848143	2848463	921	PSN	2	1	NaN	NaN	NaN	NaN	NaN
chr22	10143529	10143849	922	PSN	2	1	10143688	0.669	10143543	0.253	+
chr25	32594355	32594675	923	PSN	0	2	NaN	NaN	NaN	NaN	NaN
chr20	20386171	20386491	924	PSN	1	0	20386302	0.818	20386171	0.0841	+
chr1	10084983	10085303	925	PSN	2	0	10085045	0.728	10085171	0.459	-
chr23	7439962	7440282	926	PSN	0	2	7440118	0.868	7440249	0.202	-
chr14	32019896	32020216	927	PSN	1	0	32020001	0.847	32019896	0.373	+
chr6	49034245	49034565	928	PSN	1	0	49034336	0.696	49034427	0.317	-
chr6	16385218	16385538	929	PSN	2	1	16385419	0.766	16385537	0.145	-
chr4	6615882	6616202	930	PSN	1	0	6616201	0.841	6615885	0.235	+
chr5	20805806	20806126	931	PSN	0	0	20806125	0.753	20805826	0.129	-
chr21	9229268	9229588	932	PSN	2	0	NaN	NaN	NaN	NaN	NaN
chr6	25540213	25540533	933	PSN	1	0	25540269	0.698	25540410	0.403	+
chr24	31535758	31536078	934	PSN	0	1	31535962	0.878	31536066	0.361	-
chr11	11852885	11853205	935	PSN	1	0	11852966	0.762	11853139	0.235	-
chr21	19847609	19847929	936	PSN	0	0	19847870	0.873	19847654	0.233	+
chr5	47154931	47155251	937	PSN	1	1	47154950	0.631	47155172	0.436	+
chr5	50777568	50777888	938	PSN	0	0	50777657	0.814	50777802	0.352	-
chr10	16854679	16854999	939	PSN	2	1	16854870	0.796	16854724	0.158	+
chr8	18639791	18640111	940	PSN	0	0	18639929	0.886	18640035	0.359	-
chr19	26476311	26476631	941	PSN	2	1	26476453	0.68	26476601	0.183	-
chr17	34565767	34566087	942	PSN	0	4	34565822	0.79	34565962	0.613	+
chr15	33231434	33231754	943	PSN	2	0	33231542	0.963	33231743	0.161	-
chr6	39937489	39937809	944	PSN	0	1	39937720	0.763	39937808	0.466	-
chr17	1537015	1537335	945	PSN	2	0	1537220	0.727	1537139	0.331	-
chr20	42379498	42379818	946	PSN	2	1	42379739	0.824	42379625	0.238	-
chr1	28839231	28839551	947	PSN	1	1	28839281	0.892	28839548	0.344	+
chr3	35564945	35565265	948	PSN	0	1	35565037	0.811	35564945	0.368	+
chr14	33702527	33702847	949	PSN	1	1	33702634	0.779	33702844	0.334	+
chr9	36766895	36767215	950	PSN	0	0	36766931	0.784	36767028	0.417	-
chr23	25416689	25417009	951	PSN	2	0	25416923	0.775	25416781	0.319	-
chr21	20802067	20802387	952	PSN	1	1	20802071	0.907	20802178	0.4	-
chr4	21798557	21798877	953	PSN	2	0	21798717	0.696	21798559	0.231	+
chr8	16780343	16780663	954	PSN	1	1	16780455	0.679	16780343	0.219	+
chr2	35484922	35485242	955	PSN	2	0	35485209	0.727	35484946	0.332	-
chr7	43054319	43054639	956	PSN	1	1	43054472	0.867	43054560	0.414	-
chr6	14344648	14344968	957	PSN	1	0	14344847	0.937	14344967	0.121	-
chr22	36533090	36533410	958	PSN	2	0	NaN	NaN	NaN	NaN	NaN
chr11	3923244	3923564	959	PSN	1	1	3923529	0.893	3923382	0.302	+
chr17	11187548	11187868	960	PSN	1	1	11187712	0.904	11187860	0.253	-
chr5	42928262	42928582	961	PSN	0	1	42928370	0.797	42928262	0.207	+
chr23	26688979	26689299	962	PSN	1	1	26689186	0.714	26689053	0.14	+
chr7	30869534	30869854	963	PSN	1	0	30869680	0.642	30869632	0.438	+
chr9	14879132	14879452	964	PSN	0	0	14879232	0.88	14879369	0.533	-
chr19	9505493	9505813	965	PSN	0	1	9505687	0.849	9505507	0.0728	+
chr5	70797990	70798310	966	PSN	2	0	NaN	NaN	NaN	NaN	NaN
chr14	31779743	31780063	967	PSN	0	0	31779825	0.93	31779743	0.453	+
chr7	55565508	55565828	968	PSN	0	0	55565586	0.857	55565740	0.269	+
chr12	26823007	26823327	969	PSN	0	0	26823207	0.897	26823068	0.261	+
chr9	21777402	21777722	970	PSN	0	1	21777586	0.81	21777461	0.472	+
chr16	27830818	27831138	971	PSN	2	0	27830943	0.83	27830820	0.23	+
chr11	12098243	12098563	972	PSN	0	3	12098423	0.728	12098562	0.2	-
chr6	45850679	45850999	973	PSN	1	0	45850997	0.867	45850869	0.386	-
chr5	34411889	34412209	974	PSN	0	1	34412057	0.923	34412109	0.38	-
chr4	16101043	16101363	975	PSN	0	1	16101108	0.783	16101338	0.425	+
chr13	17727737	17728057	976	PSN	1	0	17727809	0.548	17728006	0.214	+
chr14	18464406	18464726	977	PSN	2	1	18464579	0.798	18464715	0.289	-
chr6	18081215	18081535	978	PSN	0	1	18081300	0.872	18081215	0.403	+
chr6	31430534	31430854	979	PSN	1	2	31430778	0.924	31430657	0.273	-
chr3	58759200	58759520	980	PSN	1	3	58759423	0.781	58759516	0.398	-
chr13	44049692	44050012	981	PSN	1	1	NaN	NaN	NaN	NaN	NaN
chr20	53573578	53573898	982	PSN	1	2	53573672	0.9	53573897	0.306	+
chr15	23995271	23995591	983	PSN	0	1	23995421	0.879	23995523	0.408	-
chr17	12803562	12803882	984	PSN	0	0	12803821	0.839	12803741	0.273	+
chr3	41897813	41898133	985	PSN	0	1	41898047	0.771	41897927	0.485	-
chr7	44989522	44989842	986	PSN	2	0	NaN	NaN	NaN	NaN	NaN
chr21	18711259	18711579	987	PSN	3	1	18711523	0.745	18711267	0.268	-
chr13	4168781	4169101	988	PSN	1	1	4168854	0.804	4169100	0.464	+
chr2	27644652	27644972	989	PSN	2	1	27644652	0.846	27644728	0.311	-
chr1	20074278	20074598	990	PSN	2	0	20074481	0.868	20074357	0.333	+
chr5	36155369	36155689	991	PSN	2	0	36155401	0.835	36155539	0.276	-
chr8	15636834	15637154	992	PSN	1	1	15637032	0.862	15637153	0.144	-
chr17	7966207	7966527	993	PSN	1	1	7966410	0.793	7966526	0.35	-
chr18	19755065	19755385	994	PSN	0	0	19755322	0.863	19755179	0.517	+
chr13	17515364	17515684	995	PSN	0	1	17515620	0.803	17515545	0.332	-
chr6	27603349	27603669	996	PSN	1	0	27603470	0.848	27603581	0.0856	-
chr11	8631407	8631727	997	PSN	1	0	8631609	0.839	8631480	0.406	+
chr22	40389679	40389999	998	PSN	1	0	40389715	0.814	40389825	0.341	+
chr14	44231592	44231912	999	PSN	1	0	44231743	0.92	44231881	0.294	-
chr5	34010136	34010456	1000	PSN	1	0	NaN	NaN	NaN	NaN	NaN
chr4	34662717	34663037	1001	PSN	3	3	34663036	0.859	34662762	0.213	+
chr21	3755358	3755678	1002	PSN	1	0	3755358	0.876	3755447	0.449	+
chr6	52254635	52254955	1003	PSN	0	0	52254745	0.853	52254930	0.321	+
chr13	40113183	40113503	1004	PSN	2	1	NaN	NaN	NaN	NaN	NaN
chr7	65344121	65344441	1005	PSN	1	1	NaN	NaN	NaN	NaN	NaN
chr13	14787149	14787469	1006	PSN	0	0	14787320	0.766	14787223	0.407	+
chr7	50801377	50801697	1007	PSN	2	0	50801638	0.789	50801506	0.493	-
chr12	32692449	32692769	1008	PSN	1	1	32692768	0.929	32692699	0.527	-
chr19	11644382	11644702	1009	PSN	0	0	11644544	0.784	11644382	0.254	+
chr16	57315330	57315650	1010	PSN	1	0	57315373	0.846	57315649	0.525	-
chr13	29869750	29870070	1011	PSN	1	0	29869767	0.91	29869993	0.366	+
chr11	43723689	43724009	1012	PSN	1	2	NaN	NaN	NaN	NaN	NaN
chr1	30694057	30694377	1013	PSN	0	1	30694303	0.799	30694356	0.619	-
chr7	51054856	51055176	1014	PSN	0	1	51054937	0.692	51055171	0.317	-
chr11	1374293	1374613	1015	PSN	2	0	1374315	0.857	1374612	0.202	+
chr12	17076272	17076592	1016	PSN	3	0	17076410	0.838	17076558	0.199	-
chr6	31966799	31967119	1017	PSN	1	1	31966806	0.792	31966883	0.464	+
chr8	29628433	29628753	1018	PSN	2	0	29628616	0.674	29628752	0.133	-
chr8	38338353	38338673	1019	PSN	1	0	38338404	0.82	38338548	0.198	+
chr13	31028617	31028937	1020	PSN	2	0	31028818	0.783	31028669	0.472	+
chr5	52657090	52657410	1021	PSN	0	3	52657218	0.787	52657090	0.0792	+
chr3	55370576	55370896	1022	PSN	2	1	55370743	0.534	55370859	0.297	-
chr5	16305669	16305989	1023	PSN	1	1	16305802	0.653	16305669	0.183	+
chr14	26903564	26903884	1024	PSN	2	0	26903569	0.867	26903842	0.466	+
chr4	13914483	13914803	1025	PSN	0	0	13914660	0.79	13914796	0.472	-
chr13	34167673	34167993	1026	PSN	0	0	34167914	0.855	34167700	0.439	-
chr14	35387294	35387614	1027	PSN	2	2	35387345	0.771	35387608	0.185	+
chr3	15728721	15729041	1028	PSN	2	0	15728748	0.816	15728823	0.466	-
chr7	17859973	17860293	1029	PSN	1	1	17860113	0.886	17859998	0.325	+
chr7	67239363	67239683	1030	PSN	2	2	67239577	0.776	67239363	0.102	-
chr17	50160061	50160381	1031	PSN	1	2	NaN	NaN	NaN	NaN	NaN
chr5	29172514	29172834	1032	PSN	1	1	29172748	0.873	29172514	0.299	+
chr5	38112188	38112508	1033	PSN	0	2	38112385	0.84	38112259	0.408	+
chr21	25025856	25026176	1034	PSN	1	1	25025981	0.69	25025871	0.345	+
chr19	12671921	12672241	1035	PSN	1	0	12672037	0.7	12671921	0.286	+
chr17	41313269	41313589	1036	PSN	3	0	41313509	0.797	41313362	0.515	+
chr6	36395396	36395716	1037	PSN	1	0	36395680	0.886	36395453	0.494	-
chr9	15688441	15688761	1038	PSN	1	1	15688568	0.835	15688720	0.338	+
chr17	23199248	23199568	1039	PSN	0	0	23199389	0.896	23199278	0.237	+
chr9	50308442	50308762	1040	PSN	1	0	NaN	NaN	NaN	NaN	NaN
chr9	35492861	35493181	1041	PSN	2	1	35492959	0.803	35493063	0.515	+
chr14	23285002	23285322	1042	PSN	0	1	23285171	0.884	23285033	0.518	+
chr14	33540237	33540557	1043	PSN	1	1	33540341	0.876	33540547	0.513	-
chr7	55915380	55915700	1044	PSN	3	0	NaN	NaN	NaN	NaN	NaN
chr15	16430901	16431221	1045	PSN	1	0	16431014	0.702	16431220	0.234	+
chr14	19972292	19972612	1046	PSN	1	0	19972454	0.875	19972551	0.308	-
chr4	8683171	8683491	1047	PSN	0	0	8683264	0.818	8683353	0.344	+
chr23	27916905	27917225	1048	PSN	0	3	27916905	0.942	27917041	0.334	+
chr9	28444849	28445169	1049	PSN	0	0	28444849	0.864	28444908	0.413	-
chr18	20004500	20004820	1050	PSN	0	0	20004605	0.822	20004813	0.433	-
chr25	14769020	14769340	1051	PSN	0	0	14769261	0.818	14769157	0.509	+
chr13	19373650	19373970	1052	PSN	1	0	19373776	0.867	19373660	0.259	+
chr14	41560644	41560964	1053	PSN	0	1	41560815	0.813	41560929	0.363	-
chr2	47575690	47576010	1054	PSN	1	0	47575916	0.763	47575690	0.181	-
chr12	9781007	9781327	1055	PSN	2	0	9781279	0.867	9781007	0.454	-
chr6	39091121	39091441	1056	PSN	0	0	39091307	0.804	39091177	0.332	+
chr17	41672166	41672486	1057	PSN	0	1	41672205	0.721	41672483	0.167	+
chr24	18401846	18402166	1058	PSN	1	0	18402046	0.769	18401846	0.0909	+
chr24	4530193	4530513	1059	PSN	1	2	4530270	0.856	4530488	0.422	+
chr7	42868558	42868878	1060	PSN	1	1	42868770	0.774	42868671	0.589	-
chr8	31299101	31299421	1061	PSN	2	0	31299334	0.752	31299278	0.473	+
chr24	8441032	8441352	1062	PSN	1	0	NaN	NaN	NaN	NaN	NaN
chr4	5385116	5385436	1063	PSN	1	0	NaN	NaN	NaN	NaN	NaN
chr12	6621088	6621408	1064	PSN	3	0	6621342	0.665	6621089	0.253	-
chr20	23981523	23981843	1065	PSN	1	3	23981595	0.697	23981842	0.395	+
chr1	28146730	28147050	1066	PSN	1	1	28146733	0.826	28147025	0.398	+
chr1	47048128	47048448	1067	PSN	2	1	47048179	0.845	47048371	0.455	-
chr4	26860870	26861190	1068	PSN	1	0	26861189	0.669	26860870	0.281	-
chr12	7166639	7166959	1069	PSN	0	0	7166926	0.892	7166807	0.367	-
chr2	22450559	22450879	1070	PSN	0	0	22450791	0.857	22450623	0.285	+
chr5	25977994	25978314	1071	PSN	2	0	25978201	0.78	25978067	0.148	+
chr17	23165880	23166200	1072	PSN	0	0	23166029	0.895	23165918	0.233	+
chr16	43421251	43421571	1073	PSN	1	1	43421393	0.837	43421570	0.42	+
chr4	43128845	43129165	1074	PSN	1	0	43129028	0.851	43128890	0.249	+
chr18	15540532	15540852	1075	PSN	1	0	15540687	0.816	15540547	0.455	+
chr3	40398002	40398322	1076	PSN	2	2	40398266	0.724	40398002	0.34	-
chr6	246323	246643	1077	PSN	0	3	246621	0.883	246329	0.121	+
chr16	35731915	35732235	1078	PSN	1	1	35732059	0.856	35732196	0.362	-
chr24	5071426	5071746	1079	PSN	0	1	5071529	0.756	5071666	0.48	+
chr13	2842752	2843072	1080	PSN	2	0	2843013	0.779	2842906	0.389	-
chr24	17721682	17722002	1081	PSN	2	1	17721824	0.81	17721682	0.297	+
chr14	14089183	14089503	1082	PSN	1	0	14089456	0.844	14089230	0.556	-
chr5	48044739	48045059	1083	PSN	1	0	48044975	0.819	48044765	0.481	-
chr2	21623235	21623555	1084	PSN	0	0	21623311	0.875	21623444	0.397	-
chr13	47387069	47387389	1085	PSN	2	0	47387201	0.732	47387084	0.249	+
chr13	33910459	33910779	1086	PSN	0	0	NaN	NaN	NaN	NaN	NaN
chr12	29110564	29110884	1087	PSN	2	0	29110818	0.717	29110564	0.0624	-
chr3	7646012	7646332	1088	PSN	1	1	7646233	0.806	7646331	0.362	-
chr20	20558186	20558506	1089	PSN	1	0	20558394	0.72	20558236	0.172	+
chr7	61220341	61220661	1090	PSN	0	0	61220482	0.874	61220348	0.257	+
chr14	15382795	15383115	1091	PSN	0	0	15383012	0.925	15382878	0.327	-
chr1	41295562	41295882	1092	PSN	0	0	41295834	0.9	41295753	0.513	-
chr22	16740504	16740824	1093	PSN	0	0	16740607	0.901	16740504	0.424	+
chr22	8785494	8785814	1094	PSN	2	0	8785626	0.804	8785494	0.213	+
chr13	28765518	28765838	1095	PSN	0	1	28765739	0.862	28765837	0.589	-
chr9	32238594	32238914	1096	PSN	0	1	32238805	0.755	32238710	0.508	-
chr21	36522148	36522468	1097	PSN	0	0	36522371	0.853	36522149	0.246	-
chr10	7356156	7356476	1098	PSN	2	1	7356285	0.727	7356156	0.44	+
chr8	10345036	10345356	1099	PSN	0	0	10345296	0.789	10345036	0.427	-
chr8	52034205	52034525	1100	PSN	0	0	52034390	0.874	52034205	0.0375	+
chr17	43498501	43498821	1101	PSN	2	1	43498528	0.895	43498820	0.194	-
chr25	14835400	14835720	1102	PSN	3	1	14835559	0.813	14835713	0.159	-
chr9	32331073	32331393	1103	PSN	1	0	32331343	0.911	32331210	0.22	+
chr11	33234319	33234639	1104	PSN	1	0	33234638	0.878	33234325	0.157	-
chr14	21604248	21604568	1105	PSN	0	0	21604494	0.581	21604270	0.434	-
chr6	56272131	56272451	1106	PSN	1	0	56272213	0.899	56272308	0.438	+
chr20	33361506	33361826	1107	PSN	0	1	33361693	0.776	33361535	0.362	+
chr2	25538222	25538542	1108	PSN	0	0	25538497	0.752	25538222	0.292	-
chr23	36325412	36325732	1109	PSN	0	0	36325604	0.853	36325427	0.177	+
chr23	23716336	23716656	1110	PSN	1	1	23716362	0.815	23716655	0.0917	+
chr13	32370484	32370804	1111	PSN	0	0	32370488	0.756	32370746	0.302	+
chr13	23610346	23610666	1112	PSN	0	0	23610554	0.846	23610658	0.394	-
chr20	37900674	37900994	1113	PSN	1	1	37900879	0.807	37900781	0.336	-
chr7	56004777	56005097	1114	PSN	2	0	56004932	0.524	56004833	0.268	+
chr6	18108313	18108633	1115	PSN	1	1	18108329	0.853	18108576	0.327	+
chr19	6912003	6912323	1116	PSN	1	0	6912158	0.915	6912305	0.42	-
chr23	37096413	37096733	1117	PSN	1	2	NaN	NaN	NaN	NaN	NaN
chr24	27678579	27678899	1118	PSN	2	0	27678640	0.482	27678898	0.227	+
chr13	39811732	39812052	1119	PSN	0	0	39811961	0.737	39812051	0.412	-
chr21	38456148	38456468	1120	PSN	3	0	38456304	0.655	38456149	0.268	+
chr1	21890507	21890827	1121	PSN	2	0	NaN	NaN	NaN	NaN	NaN
chr5	41368775	41369095	1122	PSN	3	1	41368806	0.728	41369069	0.308	+
chr4	7312820	7313140	1123	PSN	0	0	7313129	0.753	7313080	0.437	-
chr13	36318084	36318404	1124	PSN	3	0	36318296	0.455	36318393	0.143	-
chr18	25094786	25095106	1125	PSN	0	0	25095050	0.894	25094960	0.385	-
chr4	4426508	4426828	1126	PSN	1	3	4426750	0.856	4426585	0.295	+
chr16	8355591	8355911	1127	PSN	2	0	NaN	NaN	NaN	NaN	NaN
chr2	28287247	28287567	1128	PSN	1	0	28287271	0.853	28287374	0.354	+
chr14	6427815	6428135	1129	PSN	0	0	6427900	0.873	6428041	0.336	-
chr11	29488817	29489137	1130	PSN	1	2	29488931	0.891	29488819	0.5	+
chr22	22775186	22775506	1131	PSN	3	0	NaN	NaN	NaN	NaN	NaN
chr24	35614903	35615223	1132	PSN	0	0	NaN	NaN	NaN	NaN	NaN
chr1	25848421	25848741	1133	PSN	1	1	NaN	NaN	NaN	NaN	NaN
chr7	19727596	19727916	1134	PSN	1	3	19727666	0.786	19727915	0.266	+
chr25	17233946	17234266	1135	PSN	4	0	17234091	0.603	17233946	0.0276	+
chr12	12141043	12141363	1136	PSN	1	2	NaN	NaN	NaN	NaN	NaN
chr11	29490044	29490364	1137	PSN	0	2	29490240	0.758	29490358	0.327	-
chr12	3622105	3622425	1138	PSN	2	0	3622227	0.754	3622105	0.149	+
chr1	42394331	42394651	1139	PSN	0	0	42394413	0.876	42394554	0.309	-
chr10	29187248	29187568	1140	PSN	1	2	29187430	0.887	29187285	0.27	+
chr17	1927100	1927420	1141	PSN	1	0	NaN	NaN	NaN	NaN	NaN
chr24	28551680	28552000	1142	PSN	1	1	NaN	NaN	NaN	NaN	NaN
chr16	7850773	7851093	1143	PSN	0	1	7851040	0.876	7850870	0.177	+
chr5	33993035	33993355	1144	PSN	0	1	33993266	0.828	33993038	0.221	-
chr23	7749706	7750026	1145	PSN	0	1	7749902	0.905	7750024	0.151	-
chr1	38278739	38279059	1146	PSN	1	1	38278967	0.604	38278739	0.195	-
chr13	6281785	6282105	1147	PSN	1	1	6281868	0.841	6281963	0.306	+
chr14	41648409	41648729	1148	PSN	2	0	41648589	0.897	41648409	0.2	-
chr19	29338279	29338599	1149	PSN	2	3	29338474	0.786	29338279	0.346	-
chr10	37786161	37786481	1150	PSN	3	2	37786480	0.783	37786161	0.231	+
chr9	32593862	32594182	1151	PSN	0	0	32593977	0.891	32594122	0.239	-
chr19	31349864	31350184	1152	PSN	1	1	31350098	0.856	31349965	0.395	-
chr24	13296360	13296680	1153	PSN	2	1	13296511	0.814	13296649	0.341	-
chr4	27055040	27055360	1154	PSN	1	0	27055098	0.687	27055331	0.208	+
chr9	18306348	18306668	1155	PSN	2	2	18306553	0.689	18306348	0.322	+
chr18	33068770	33069090	1156	PSN	1	3	33069012	0.868	33068770	0.232	-
chr13	1136225	1136545	1157	PSN	0	0	1136508	0.373	1136383	0.232	-
chr20	22165716	22166036	1158	PSN	4	0	22165863	0.763	22165767	0.329	+
chr7	54543671	54543991	1159	PSN	2	0	54543801	0.695	54543894	0.49	+
chr5	48034501	48034821	1160	PSN	0	1	48034635	0.792	48034501	0.174	+
chr4	46374729	46375049	1161	PSN	0	1	46374967	0.859	46374833	0.205	-
chr24	9296756	9297076	1162	PSN	2	1	9296795	0.578	9297075	0.237	+
chr2	43908214	43908534	1163	PSN	3	0	43908317	0.832	43908214	0.277	+
chr18	42262496	42262816	1164	PSN	1	0	42262668	0.77	42262815	0.0866	-
chr5	56219809	56220129	1165	PSN	3	0	56219951	0.691	56220030	0.485	-
chr16	8394563	8394883	1166	PSN	2	1	8394675	0.647	8394812	0.234	-
chr2	27647607	27647927	1167	PSN	1	1	27647810	0.803	27647607	0.363	+
chr1	18157240	18157560	1168	PSN	3	0	18157274	0.852	18157559	0.264	+
chr7	14350509	14350829	1169	PSN	0	1	14350541	0.741	14350704	0.375	+
chr6	28589129	28589449	1170	PSN	0	0	NaN	NaN	NaN	NaN	NaN
chr14	37451278	37451598	1171	PSN	1	0	37451433	0.781	37451278	0.379	+
chr6	51259588	51259908	1172	PSN	0	0	51259595	0.842	51259677	0.39	+
chr11	30034265	30034585	1173	PSN	1	1	30034419	0.733	30034265	0.179	+
chr5	36696363	36696683	1174	PSN	0	2	36696553	0.761	36696363	0.316	-
chr16	44785286	44785606	1175	PSN	0	1	44785476	0.748	44785339	0.158	+
chr16	26208846	26209166	1176	PSN	0	0	26209105	0.887	26208846	0.332	-
chr2	21614229	21614549	1177	PSN	1	1	21614389	0.931	21614284	0.337	+
chr1	30673655	30673975	1178	PSN	0	0	30673658	0.769	30673680	0.566	+
chr15	28376375	28376695	1179	PSN	0	1	28376645	0.772	28376452	0.344	+
chr16	44559430	44559750	1180	PSN	1	1	44559622	0.745	44559443	0.338	-
chr12	27564606	27564926	1181	PSN	1	0	27564729	0.915	27564829	0.524	-
chr5	15331491	15331811	1182	PSN	4	1	15331606	0.694	15331501	0.416	+
chr24	20066268	20066588	1183	PSN	1	0	20066311	0.581	20066535	0.321	+
chr15	2417968	2418288	1184	PSN	0	0	2418220	0.761	2418155	0.477	-
chr1	25920156	25920476	1185	PSN	1	2	25920211	0.943	25920475	0.313	+
chr1	35201753	35202073	1186	PSN	1	0	35201901	0.648	35201761	0.148	+
chr22	38784959	38785279	1187	PSN	0	0	NaN	NaN	NaN	NaN	NaN
chr23	35756762	35757082	1188	PSN	0	2	35756859	0.918	35756762	0.305	+
chr23	18585151	18585471	1189	PSN	1	0	18585316	0.909	18585151	0.313	+
chr10	13744398	13744718	1190	PSN	2	0	NaN	NaN	NaN	NaN	NaN
chr8	30823487	30823807	1191	PSN	2	0	30823805	0.881	30823589	0.58	-
chr13	39798574	39798894	1192	PSN	2	0	39798733	0.785	39798615	0.33	+
chr4	28312656	28312976	1193	PSN	1	0	28312718	0.737	28312825	0.292	+
chr4	27643778	27644098	1194	PSN	1	0	27643940	0.892	27643867	0.387	+
chr7	26905896	26906216	1195	PSN	0	0	26906098	0.892	26905898	0.477	-
chr5	42427280	42427600	1196	PSN	0	0	42427429	0.757	42427334	0.4	+
chr18	20104256	20104576	1197	PSN	1	1	20104449	0.935	20104558	0.343	-
chr10	31614245	31614565	1198	PSN	0	0	31614449	0.747	31614547	0.52	-
chr4	8215361	8215681	1199	PSN	0	1	8215555	0.805	8215639	0.392	-
chr19	12633024	12633344	1200	PSN	0	0	12633139	0.6	12633024	0.266	+
chr11	31918687	31919007	1201	PSN	2	0	31918946	0.827	31918774	0.0626	+
chr2	48075369	48075689	1202	PSN	1	1	48075591	0.538	48075438	0.194	-
chr10	10292210	10292530	1203	PSN	3	0	NaN	NaN	NaN	NaN	NaN
chr5	21479447	21479767	1204	PSN	2	2	21479524	0.683	21479712	0.186	-
chr11	19418884	19419204	1205	PSN	4	1	19419044	0.831	19419192	0.115	-
chr21	18734631	18734951	1206	PSN	0	0	18734704	0.871	18734893	0.588	+
chr5	39230150	39230470	1207	PSN	0	2	39230342	0.671	39230461	0.0643	-
chr12	29124132	29124452	1208	PSN	1	1	29124151	0.904	29124451	0.348	+
chr10	34383278	34383598	1209	PSN	0	2	34383524	0.83	34383278	0.481	-
chr5	20116443	20116763	1210	PSN	1	1	20116661	0.902	20116762	0.429	-
chr8	22120659	22120979	1211	PSN	0	0	22120834	0.71	22120659	0.346	+
chr19	28670111	28670431	1212	PSN	2	2	28670168	0.874	28670282	0.436	-
chr11	26202484	26202804	1213	PSN	3	1	NaN	NaN	NaN	NaN	NaN
chr21	20407098	20407418	1214	PSN	1	0	NaN	NaN	NaN	NaN	NaN
chr1	36116254	36116574	1215	PSN	2	0	36116541	0.878	36116400	0.348	+
chr10	39498504	39498824	1216	PSN	1	1	39498560	0.769	39498804	0.456	+
chr24	13081982	13082302	1217	PSN	0	1	13081990	0.82	13082078	0.446	-
chr5	66077460	66077780	1218	PSN	0	0	NaN	NaN	NaN	NaN	NaN
chr4	12518718	12519038	1219	PSN	2	0	12518903	0.729	12518757	0.158	+
chr17	38644635	38644955	1220	PSN	1	1	38644742	0.832	38644951	0.137	-
chr17	42015644	42015964	1221	PSN	1	0	42015959	0.945	42015644	0.156	+
chr23	30105923	30106243	1222	PSN	1	0	NaN	NaN	NaN	NaN	NaN
chr15	28058987	28059307	1223	PSN	0	1	28059182	0.925	28059086	0.493	+
chr24	4525648	4525968	1224	PSN	2	2	4525967	0.915	4525651	0.412	+
chr21	8502729	8503049	1225	PSN	0	0	8502868	0.791	8502775	0.478	+
chr4	24119679	24119999	1226	PSN	0	0	24119788	0.868	24119888	0.327	-
chr22	20355346	20355666	1227	PSN	1	0	20355554	0.729	20355425	0.365	+
chr8	24801728	24802048	1228	PSN	1	1	24801909	0.762	24801728	0.347	+
chr17	21120021	21120341	1229	PSN	1	1	21120139	0.891	21120026	0.347	+
chr24	13899828	13900148	1230	PSN	0	2	13899902	0.824	13900040	0.584	+
chr25	37453336	37453656	1231	PSN	1	1	37453413	0.693	37453655	0.145	+
chr12	9790722	9791042	1232	PSN	2	0	9790825	0.804	9790727	0.43	+
chr3	8970196	8970516	1233	PSN	3	0	8970305	0.697	8970207	0.328	+
chr3	40753400	40753720	1234	PSN	0	0	NaN	NaN	NaN	NaN	NaN
chr20	20422730	20423050	1235	PSN	4	0	20423025	0.806	20422853	0.12	+
chr23	1045423	1045743	1236	PSN	0	1	1045495	0.787	1045582	0.397	+
chr13	22848662	22848982	1237	PSN	2	1	22848960	0.887	22848841	0.295	+
chr14	25836084	25836404	1238	PSN	0	0	25836258	0.703	25836354	0.304	-
chr3	27481125	27481445	1239	PSN	1	0	27481417	0.684	27481125	0.472	-
chr7	42011486	42011806	1240	PSN	0	0	42011635	0.866	42011781	0.322	-
chr5	62358637	62358957	1241	PSN	1	0	62358807	0.669	62358662	0.0558	+
chr9	14749118	14749438	1242	PSN	0	1	NaN	NaN	NaN	NaN	NaN
chr15	24013211	24013531	1243	PSN	2	0	24013409	0.724	24013280	0.454	+
chr9	56469875	56470195	1244	PSN	2	1	56470028	0.791	56470118	0.407	-
chr12	49430778	49431098	1245	PSN	1	1	NaN	NaN	NaN	NaN	NaN
chr8	31289206	31289526	1246	PSN	1	0	31289421	0.799	31289248	0.15	+
chr22	25554250	25554570	1247	PSN	1	1	25554396	0.835	25554318	0.276	+
chr23	30119391	30119711	1248	PSN	0	0	NaN	NaN	NaN	NaN	NaN
chr5	44564008	44564328	1249	PSN	3	0	NaN	NaN	NaN	NaN	NaN
chr5	53529422	53529742	1250	PSN	0	1	53529473	0.892	53529695	0.519	+
chr12	33178666	33178986	1251	PSN	2	0	33178770	0.63	33178985	0.289	+
chr8	47907750	47908070	1252	PSN	0	1	47908061	0.704	47907750	0.206	-
chr16	28382724	28383044	1253	PSN	0	0	28382951	0.817	28383043	0.453	-
chr7	24716644	24716964	1254	PSN	0	0	24716798	0.822	24716654	0.469	+
chr11	30884704	30885024	1255	PSN	2	0	30884778	0.764	30885023	0.274	+
chr24	20037182	20037502	1256	PSN	1	0	20037402	0.784	20037295	0.314	+
chr9	31974471	31974791	1257	PSN	2	2	31974471	0.871	31974564	0.237	-
chr1	47328022	47328342	1258	PSN	1	1	47328098	0.906	47328341	0.358	+
chr17	42397887	42398207	1259	PSN	1	0	42398031	0.855	42398141	0.25	-
chr21	5483528	5483848	1260	PSN	4	0	5483753	0.822	5483528	0.209	-
chr6	12186002	12186322	1261	PSN	0	0	12186123	0.865	12186223	0.4	+
chr20	26650618	26650938	1262	PSN	1	0	NaN	NaN	NaN	NaN	NaN
chr7	34975313	34975633	1263	PSN	1	2	34975598	0.915	34975313	0.291	-
chr11	30885632	30885952	1264	PSN	1	1	30885649	0.927	30885767	0.427	+
chr7	42152474	42152794	1265	PSN	0	2	42152503	0.745	42152750	0.559	+
chr5	19661891	19662211	1266	PSN	0	0	19662205	0.69	19661906	0.331	+
chr15	27154928	27155248	1267	PSN	0	0	27154938	0.878	27155215	0.458	+
chr15	40943590	40943910	1268	PSN	1	2	40943694	0.953	40943590	0.441	+
chr14	44396279	44396599	1269	PSN	0	1	44396355	0.76	44396467	0.375	+
chr1	7727653	7727973	1270	PSN	0	0	7727653	0.862	7727732	0.434	+
chr22	2419017	2419337	1271	PSN	1	0	2419315	0.745	2419217	0.286	-
chr17	18453533	18453853	1272	PSN	1	1	NaN	NaN	NaN	NaN	NaN
chr21	20407910	20408230	1273	PSN	1	0	20408114	0.753	20407947	0.119	+
chr7	44321038	44321358	1274	PSN	2	0	44321076	0.845	44321357	0.274	+
chr5	43314917	43315237	1275	PSN	1	0	43315086	0.607	43315235	0.141	-
chr11	24586898	24587218	1276	PSN	4	0	NaN	NaN	NaN	NaN	NaN
chr20	4361847	4362167	1277	PSN	2	0	NaN	NaN	NaN	NaN	NaN
chr6	12832993	12833313	1278	PSN	2	2	12833312	0.652	12833258	0.336	+
chr9	42844292	42844612	1279	PSN	0	2	42844462	0.754	42844328	0.211	+
chr19	9073765	9074085	1280	PSN	1	0	9073908	0.857	9074017	0.291	-
chr16	17759346	17759666	1281	PSN	1	2	17759491	0.705	17759354	0.371	+
chr13	41380310	41380630	1282	PSN	2	0	41380495	0.794	41380400	0.488	+
chr7	17923403	17923723	1283	PSN	2	1	17923546	0.812	17923410	0.285	+
chr6	12361159	12361479	1284	PSN	2	0	12361237	0.858	12361383	0.24	-
chr9	38626316	38626636	1285	PSN	2	1	38626590	0.744	38626345	0.485	-
chr3	44119989	44120309	1286	PSN	2	0	44120241	0.77	44120122	0.456	-
chr9	53820410	53820730	1287	PSN	0	1	53820569	0.767	53820726	0.108	-
chr8	20329845	20330165	1288	PSN	1	0	20329858	0.832	20330138	0.363	-
chr3	24221705	24222025	1289	PSN	4	0	24221804	0.859	24221916	0.23	-
chr10	10922796	10923116	1290	PSN	0	0	10922999	0.594	10922903	0.246	+
chr5	69201149	69201469	1291	PSN	2	0	NaN	NaN	NaN	NaN	NaN
chr17	753442	753762	1292	PSN	1	4	NaN	NaN	NaN	NaN	NaN
chr15	3570099	3570419	1293	PSN	3	0	NaN	NaN	NaN	NaN	NaN
chr7	37306165	37306485	1294	PSN	1	0	37306353	0.782	37306480	0.461	-
chr4	28465522	28465842	1295	PSN	4	0	28465794	0.567	28465660	0.249	+
chr17	46033635	46033955	1296	PSN	1	2	46033687	0.792	46033776	0.432	+
chr2	33710436	33710756	1297	PSN	0	0	33710648	0.807	33710755	0.336	-
chr8	33750587	33750907	1298	PSN	0	1	33750727	0.851	33750886	0.288	-
chr5	16339845	16340165	1299	PSN	0	0	16339846	0.903	16340056	0.409	+
chr5	45185950	45186270	1300	PSN	1	0	45186115	0.808	45186002	0.473	+
chr8	28792618	28792938	1301	PSN	0	0	28792776	0.605	28792618	0.132	+
chr12	49669378	49669698	1302	PSN	2	0	49669581	0.75	49669418	0.0204	+
chr4	15765804	15766124	1303	PSN	2	2	15765947	0.817	15765804	0.261	+
chr4	5397955	5398275	1304	PSN	2	0	5398141	0.62	5398030	0.233	+
chr4	8927448	8927768	1305	PSN	1	0	8927694	0.781	8927617	0.429	-
chr9	27438716	27439036	1306	PSN	0	1	27438870	0.822	27438716	0.214	+
chr19	21101291	21101611	1307	PSN	1	1	21101521	0.89	21101408	0.441	-
chr18	35643727	35644047	1308	PSN	0	1	35643939	0.904	35644019	0.416	-
chr7	52276751	52277071	1309	PSN	0	1	52276931	0.942	52277070	0.285	-
chr8	53804620	53804940	1310	PSN	2	0	53804748	0.903	53804874	0.171	-
chr23	38962795	38963115	1311	PSN	0	0	NaN	NaN	NaN	NaN	NaN
chr6	43012669	43012989	1312	PSN	0	2	43012897	0.708	43012670	0.397	+
chr16	15055704	15056024	1313	PSN	1	0	15055747	0.955	15056023	0.255	+
chr7	69614242	69614562	1314	PSN	3	0	69614557	0.632	69614278	0.269	-
chr9	14095660	14095980	1315	PSN	1	0	14095726	0.708	14095924	0.425	+
chr8	34903672	34903992	1316	PSN	1	2	34903991	0.85	34903887	0.3	-
chr7	46039875	46040195	1317	PSN	0	0	46040026	0.613	46040163	0.306	-
chr19	15081064	15081384	1318	PSN	3	1	15081115	0.851	15081293	0.478	+
chr11	8244475	8244795	1319	PSN	0	1	8244717	0.828	8244665	0.579	+
chr18	22398363	22398683	1320	PSN	0	0	NaN	NaN	NaN	NaN	NaN
chr19	44806394	44806714	1321	PSN	1	1	NaN	NaN	NaN	NaN	NaN
chr13	31365648	31365968	1322	PSN	0	0	NaN	NaN	NaN	NaN	NaN
chr16	25848734	25849054	1323	PSN	0	1	25848960	0.88	25849053	0.531	-
chr5	29917287	29917607	1324	PSN	0	1	29917369	0.827	29917510	0.353	+
chr22	18914700	18915020	1325	PSN	2	0	NaN	NaN	NaN	NaN	NaN
chr25	408770	409090	1326	PSN	2	0	409003	0.736	408770	0.401	-
chr3	42888362	42888682	1327	PSN	2	0	42888563	0.754	42888401	0.159	+
chr23	23731192	23731512	1328	PSN	0	2	23731270	0.855	23731412	0.453	-
chr13	5757208	5757528	1329	PSN	1	1	5757325	0.914	5757208	0.415	+
chr3	42483263	42483583	1330	PSN	1	1	42483479	0.851	42483582	0.331	-
chr5	42229194	42229514	1331	PSN	0	0	42229441	0.577	42229513	0.348	-
chr19	44747142	44747462	1332	PSN	4	0	NaN	NaN	NaN	NaN	NaN
chr19	46057481	46057801	1333	PSN	1	0	46057540	0.663	46057800	0.399	+
chr12	8390331	8390651	1334	PSN	0	1	NaN	NaN	NaN	NaN	NaN
chr3	31034091	31034411	1335	PSN	1	1	31034275	0.783	31034406	0.105	-
chr3	56621140	56621460	1336	PSN	0	1	56621151	0.927	56621459	0.337	+
chr13	2846621	2846941	1337	PSN	1	0	2846764	0.881	2846621	0.258	+
chr11	5259850	5260170	1338	PSN	1	0	NaN	NaN	NaN	NaN	NaN
chr23	37771030	37771350	1339	PSN	0	0	NaN	NaN	NaN	NaN	NaN
chr2	27295385	27295705	1340	PSN	3	0	27295395	0.506	27295481	0.196	-
chr7	31565664	31565984	1341	PSN	2	0	31565706	0.919	31565983	0.188	+
chr19	20742538	20742858	1342	PSN	1	1	20742673	0.745	20742538	0.126	+
chr18	45891412	45891732	1343	PSN	1	2	NaN	NaN	NaN	NaN	NaN
chr3	33249891	33250211	1344	PSN	1	0	33250196	0.582	33250077	0.414	+
chr10	39046173	39046493	1345	PSN	3	1	39046432	0.806	39046312	0.393	-
chr4	4555707	4556027	1346	PSN	0	1	4555764	0.636	4556026	0.217	+
chr22	717788	718108	1347	PSN	2	1	717912	0.806	717788	0.207	+
chr11	14715300	14715620	1348	PSN	3	2	NaN	NaN	NaN	NaN	NaN
chr20	23030795	23031115	1349	PSN	3	0	23031044	0.834	23030919	0.327	+
chr6	51101108	51101428	1350	PSN	2	0	NaN	NaN	NaN	NaN	NaN
chr5	35427302	35427622	1351	PSN	2	1	35427302	0.656	35427581	0.294	-
chr19	8087970	8088290	1352	PSN	2	0	8088062	0.799	8088289	0.346	+
chr9	17657550	17657870	1353	PSN	0	2	17657707	0.709	17657550	0.075	+
chr4	615873	616193	1354	PSN	0	1	NaN	NaN	NaN	NaN	NaN
chr7	52257071	52257391	1355	PSN	0	1	52257125	0.903	52257388	0.188	+
chr7	26214538	26214858	1356	PSN	1	2	26214666	0.847	26214813	0.367	-
chr5	41343258	41343578	1357	PSN	1	0	41343475	0.853	41343577	0.232	-
chr23	23080051	23080371	1358	PSN	0	1	23080108	0.815	23080370	0.378	+
chr15	35440772	35441092	1359	PSN	2	0	35440994	0.845	35441086	0.233	-
chr16	41612516	41612836	1360	PSN	0	1	41612709	0.896	41612835	0.116	-
chr3	23868077	23868397	1361	PSN	1	0	23868235	0.927	23868387	0.0872	-
chr19	927719	928039	1362	PSN	1	0	NaN	NaN	NaN	NaN	NaN
chr17	16691011	16691331	1363	PSN	1	1	16691232	0.759	16691325	0.319	-
chr7	31200910	31201230	1364	PSN	0	0	31200978	0.916	31201100	0.217	+
chr15	32344315	32344635	1365	PSN	0	1	32344533	0.836	32344394	0.125	+
chr14	40624343	40624663	1366	PSN	0	0	40624415	0.703	40624478	0.568	+
chr5	57747130	57747450	1367	PSN	2	0	57747213	0.887	57747449	0.349	+
chr19	43579842	43580162	1368	PSN	0	1	43580077	0.83	43579990	0.373	-
chr14	38824209	38824529	1369	PSN	0	2	38824306	0.804	38824423	0.374	-
chr3	19576888	19577208	1370	PSN	0	2	19576972	0.621	19576888	0.375	+
chr8	1415089	1415409	1371	PSN	0	2	NaN	NaN	NaN	NaN	NaN
chr15	17235480	17235800	1372	PSN	0	1	17235775	0.882	17235541	0.529	-
chr25	22284703	22285023	1373	PSN	0	0	22284860	0.697	22284703	0.0601	+
chr5	38543829	38544149	1374	PSN	0	1	NaN	NaN	NaN	NaN	NaN
chr13	33129867	33130187	1375	PSN	1	0	33129884	0.945	33129971	0.441	+
chr2	48416329	48416649	1376	PSN	0	1	48416511	0.9	48416368	0.168	+
chr16	42075049	42075369	1377	PSN	2	0	42075291	0.813	42075067	0.5	-
chr13	32369542	32369862	1378	PSN	0	1	NaN	NaN	NaN	NaN	NaN
chr10	40418060	40418380	1379	PSN	2	0	NaN	NaN	NaN	NaN	NaN
chr17	20329151	20329471	1380	PSN	0	1	20329335	0.846	20329189	0.104	+
chr12	33426291	33426611	1381	PSN	3	1	33426367	0.667	33426488	0.193	+
chr9	32317506	32317826	1382	PSN	1	1	NaN	NaN	NaN	NaN	NaN
chr21	11356271	11356591	1383	PSN	0	1	11356341	0.875	11356564	0.418	+
chr22	38856922	38857242	1384	PSN	3	0	38856925	0.731	38857220	0.276	-
chr5	26768572	26768892	1385	PSN	2	0	26768798	0.789	26768651	0.201	+
chr2	28706723	28707043	1386	PSN	1	0	28706766	0.645	28706980	0.473	-
chr23	21912257	21912577	1387	PSN	2	1	NaN	NaN	NaN	NaN	NaN
chr24	17746726	17747046	1388	PSN	1	0	17746781	0.878	17746892	0.451	-
chr15	35373934	35374254	1389	PSN	2	0	35374096	0.778	35373949	0.121	+
chr3	35642630	35642950	1390	PSN	0	0	35642768	0.862	35642631	0.318	+
chr9	21223208	21223528	1391	PSN	0	1	21223346	0.761	21223491	0.174	+
chr17	21896523	21896843	1392	PSN	0	1	21896636	0.842	21896531	0.508	+
chr3	24056613	24056933	1393	PSN	1	1	24056836	0.604	24056932	0.292	-
chr15	22076215	22076535	1394	PSN	0	1	22076242	0.76	22076415	0.493	+
chr20	8203248	8203568	1395	PSN	2	1	NaN	NaN	NaN	NaN	NaN
chr15	16998700	16999020	1396	PSN	2	2	16998874	0.852	16998992	0.203	-
chr2	30464573	30464893	1397	PSN	2	1	30464710	0.78	30464857	0.101	-
chr7	34312498	34312818	1398	PSN	1	0	34312562	0.814	34312737	0.343	+
chr18	44759018	44759338	1399	PSN	1	1	NaN	NaN	NaN	NaN	NaN
chr24	22155767	22156087	1400	PSN	0	2	22156052	0.843	22155767	0.414	-
chr13	49338869	49339189	1401	PSN	2	0	49339168	0.79	49339081	0.353	-
chr3	43254416	43254736	1402	PSN	0	2	43254538	0.796	43254416	0.0945	+
chr1	23982401	23982721	1403	PSN	0	0	23982474	0.883	23982692	0.464	+
chr10	43990313	43990633	1404	PSN	1	1	43990517	0.871	43990629	0.294	-
chr6	49353092	49353412	1405	PSN	1	1	49353149	0.884	49353411	0.45	+
chr5	60005053	60005373	1406	PSN	2	0	60005211	0.69	60005341	0.161	-
chr10	16260894	16261214	1407	PSN	1	1	16261063	0.836	16260916	0.308	+
chr3	32548522	32548842	1408	PSN	2	0	32548798	0.796	32548527	0.356	-
chr22	23684214	23684534	1409	PSN	1	1	23684490	0.833	23684381	0.41	-
chr9	34658704	34659024	1410	PSN	2	0	34658852	0.755	34658971	0.29	-
chr16	26337850	26338170	1411	PSN	0	1	NaN	NaN	NaN	NaN	NaN
chr19	12775928	12776248	1412	PSN	1	0	NaN	NaN	NaN	NaN	NaN
chr23	2920763	2921083	1413	PSN	0	1	NaN	NaN	NaN	NaN	NaN
chr24	24947203	24947523	1414	PSN	0	1	24947408	0.807	24947273	0.545	+
chr12	25177828	25178148	1415	PSN	2	0	25177965	0.574	25177829	0.241	+
chr20	28257429	28257749	1416	PSN	2	0	28257611	0.781	28257447	0.136	+
chr9	43174042	43174362	1417	PSN	0	1	43174154	0.75	43174291	0.156	+
chr9	24387569	24387889	1418	PSN	1	0	24387866	0.874	24387756	0.347	-
chr19	23014392	23014712	1419	PSN	1	1	23014671	0.865	23014558	0.401	-
chr18	43042649	43042969	1420	PSN	0	0	43042735	0.779	43042843	0.432	-
chr7	44346023	44346343	1421	PSN	0	0	44346320	0.7	44346168	0.358	-
chr23	37907391	37907711	1422	PSN	1	0	37907411	0.716	37907710	0.389	+
chr21	3687773	3688093	1423	PSN	0	0	NaN	NaN	NaN	NaN	NaN
chr1	49845968	49846288	1424	PSN	3	1	NaN	NaN	NaN	NaN	NaN
chr8	15538246	15538566	1425	PSN	1	0	15538300	0.936	15538416	0.178	-
chr8	26690958	26691278	1426	PSN	0	0	26691208	0.834	26690958	0.175	+
chr24	25074958	25075278	1427	PSN	0	1	25075205	0.825	25075035	0.187	+
chr16	32969553	32969873	1428	PSN	0	2	32969833	0.687	32969872	0.435	-
chr5	29156319	29156639	1429	PSN	0	1	29156475	0.834	29156319	0.142	+
chr17	21107349	21107669	1430	PSN	3	1	21107370	0.76	21107514	0.454	-
chr23	38333788	38334108	1431	PSN	1	1	NaN	NaN	NaN	NaN	NaN
chr18	32421339	32421659	1432	PSN	0	0	32421509	0.832	32421656	0.0662	-
chr15	16167501	16167821	1433	PSN	2	0	16167676	0.699	16167820	0.132	-
chr12	33413513	33413833	1434	PSN	1	0	33413679	0.868	33413832	0.127	-
chr1	47237546	47237866	1435	PSN	0	0	47237669	0.921	47237582	0.391	+
chr6	25365457	25365777	1436	PSN	0	1	25365550	0.843	25365698	0.0896	-
chr4	27626163	27626483	1437	PSN	1	0	27626405	0.759	27626274	0.435	-
chr4	7521814	7522134	1438	PSN	1	1	7522065	0.937	7521971	0.521	-
chr9	38456373	38456693	1439	PSN	2	4	38456443	0.666	38456523	0.48	+
chr19	14883399	14883719	1440	PSN	0	0	14883547	0.805	14883700	0.0451	-
chr24	27186878	27187198	1441	PSN	3	0	27187124	0.738	27186879	0.273	-
chr8	31953302	31953622	1442	PSN	2	0	31953353	0.716	31953579	0.126	+
chr6	7219253	7219573	1443	PSN	3	1	7219406	0.712	7219262	0.473	+
chr14	21922338	21922658	1444	PSN	0	0	21922503	0.808	21922373	0.333	+
chr6	46824281	46824601	1445	PSN	3	0	46824425	0.68	46824281	0.114	+
chr22	18968624	18968944	1446	PSN	1	0	18968712	0.736	18968861	0.276	-
chr17	23792166	23792486	1447	PSN	2	0	23792302	0.878	23792485	0.318	+
chr23	23160968	23161288	1448	PSN	0	0	23161270	0.883	23160990	0.391	-
chr25	29919679	29919999	1449	PSN	1	0	29919776	0.742	29919882	0.278	-
chr17	13668547	13668867	1450	PSN	1	0	13668559	0.721	13668740	0.251	+
chr25	37657588	37657908	1451	PSN	1	0	NaN	NaN	NaN	NaN	NaN
chr13	28729875	28730195	1452	PSN	1	0	28730108	0.752	28730194	0.235	-
chr12	30014956	30015276	1453	PSN	1	1	30015200	0.798	30015275	0.384	-
chr12	10118548	10118868	1454	PSN	2	1	10118640	0.689	10118852	0.299	+
chr9	13093527	13093847	1455	PSN	0	0	13093757	0.716	13093527	0.247	+
chr16	25526237	25526557	1456	PSN	1	0	NaN	NaN	NaN	NaN	NaN
chr20	8196028	8196348	1457	PSN	3	1	NaN	NaN	NaN	NaN	NaN
chr9	31406604	31406924	1458	PSN	1	1	NaN	NaN	NaN	NaN	NaN
chr8	26246278	26246598	1459	PSN	2	1	26246361	0.761	26246278	0.364	+
chr3	32701786	32702106	1460	PSN	0	1	32701931	0.786	32702077	0.45	-
chr3	23861872	23862192	1461	PSN	0	3	NaN	NaN	NaN	NaN	NaN
chr1	41619527	41619847	1462	PSN	2	0	41619563	0.803	41619764	0.486	-
chr5	45808611	45808931	1463	PSN	1	0	45808691	0.804	45808930	0.343	+
chr12	27554514	27554834	1464	PSN	0	2	27554598	0.735	27554734	0.316	-
chr1	28822951	28823271	1465	PSN	2	0	28823233	0.642	28823107	0.204	-
chr2	32411309	32411629	1466	PSN	2	1	32411622	0.78	32411385	0.505	-
chr7	57567776	57568096	1467	PSN	0	1	57567885	0.913	57567980	0.347	+
chr24	19339855	19340175	1468	PSN	0	2	19340040	0.821	19340166	0.548	-
chr23	27945430	27945750	1469	PSN	2	2	27945629	0.832	27945433	0.276	+
chr12	33409123	33409443	1470	PSN	1	1	33409305	0.942	33409424	0.232	-
chr22	16746028	16746348	1471	PSN	0	0	16746221	0.77	16746051	0.199	+
chr21	15986478	15986798	1472	PSN	1	1	15986537	0.78	15986797	0.307	+
chr7	25584926	25585246	1473	PSN	0	2	25585162	0.726	25585006	0.233	+
chr6	39936459	39936779	1474	PSN	0	0	39936612	0.831	39936475	0.243	+
chr5	46090557	46090877	1475	PSN	0	0	46090730	0.693	46090872	0.267	-
chr9	43741469	43741789	1476	PSN	1	2	43741750	0.762	43741470	0.215	-
chr17	30388413	30388733	1477	PSN	3	0	30388566	0.834	30388429	0.187	+
chr25	13321096	13321416	1478	PSN	2	0	13321401	0.677	13321287	0.388	-
chr14	33701669	33701989	1479	PSN	1	2	33701798	0.767	33701674	0.426	+
chr11	19699622	19699942	1480	PSN	1	1	19699757	0.755	19699881	0.128	-
chr3	41904343	41904663	1481	PSN	2	1	41904438	0.842	41904349	0.552	+
chr1	39990869	39991189	1482	PSN	0	0	39991184	0.762	39991003	0.236	+
chr5	25874982	25875302	1483	PSN	1	1	25875197	0.866	25875300	0.329	-
chr23	9580605	9580925	1484	PSN	2	0	9580772	0.828	9580918	0.189	-
chr3	32705197	32705517	1485	PSN	1	0	32705275	0.802	32705444	0.191	-
chr2	166363	166683	1486	PSN	1	1	166419	0.861	166552	0.468	+
chr1	40235303	40235623	1487	PSN	1	3	40235529	0.668	40235320	0.426	+
chr6	784050	784370	1488	PSN	1	0	NaN	NaN	NaN	NaN	NaN
chr11	43715218	43715538	1489	PSN	2	0	NaN	NaN	NaN	NaN	NaN
chr7	63801693	63802013	1490	PSN	1	1	63801708	0.698	63801863	0.478	+
chr15	27988131	27988451	1491	PSN	1	0	27988280	0.796	27988431	0.377	-
chr19	22175250	22175570	1492	PSN	2	0	22175456	0.87	22175296	0.0657	+
chr7	29245589	29245909	1493	PSN	1	0	29245695	0.799	29245795	0.452	+
chr13	32410313	32410633	1494	PSN	0	3	32410428	0.802	32410632	0.167	+
chr2	27642862	27643182	1495	PSN	0	0	NaN	NaN	NaN	NaN	NaN
chr7	49279953	49280273	1496	PSN	2	2	49280267	0.729	49280011	0.375	-
chr23	17724579	17724899	1497	PSN	0	0	17724750	0.828	17724889	0.201	-
chr16	1391804	1392124	1498	PSN	2	1	1391943	0.868	1391806	0.0942	+
chr1	46178854	46179174	1499	PSN	1	0	46178960	0.85	46179173	0.502	+
chr6	40947262	40947582	1500	PSN	2	0	40947490	0.871	40947378	0.21	+
chr8	26389601	26389921	1501	PSN	2	1	26389654	0.776	26389870	0.326	+
chr23	10451460	10451780	1502	PSN	1	0	10451666	0.639	10451460	0.112	+
chr15	39264051	39264371	1503	PSN	2	0	39264222	0.891	39264345	0.2	-
chr13	39892216	39892536	1504	PSN	1	0	39892234	0.718	39892346	0.284	+
chr17	49234447	49234767	1505	PSN	1	0	49234634	0.707	49234447	0.283	-
chr12	24860193	24860513	1506	PSN	2	0	24860301	0.859	24860193	0.1	+
chr2	37030459	37030779	1507	PSN	2	0	37030622	0.835	37030466	0.197	+
chr4	40224327	40224647	1508	PSN	1	1	40224561	0.84	40224468	0.318	-
chr6	54098846	54099166	1509	PSN	0	1	54098954	0.909	54098846	0.291	+
chr17	21481158	21481478	1510	PSN	1	0	21481474	0.758	21481158	0.229	+
chr23	3464656	3464976	1511	PSN	2	0	NaN	NaN	NaN	NaN	NaN
chr25	18623716	18624036	1512	PSN	1	0	18623746	0.85	18623829	0.435	+
chr12	38771391	38771711	1513	PSN	0	2	38771615	0.848	38771710	0.576	-
chr4	18366200	18366520	1514	PSN	1	2	18366350	0.925	18366214	0.115	+
chr9	19527603	19527923	1515	PSN	1	2	19527847	0.812	19527634	0.321	-
chr17	1007757	1008077	1516	PSN	2	0	NaN	NaN	NaN	NaN	NaN
chr12	9210287	9210607	1517	PSN	1	0	NaN	NaN	NaN	NaN	NaN
chr21	10167813	10168133	1518	PSN	0	1	NaN	NaN	NaN	NaN	NaN
chr2	10072900	10073220	1519	PSN	1	0	10072958	0.878	10073191	0.438	-
chr1	19060151	19060471	1520	PSN	2	0	19060201	0.806	19060322	0.547	+
chr10	24745869	24746189	1521	PSN	0	0	24745995	0.791	24745885	0.304	+
chr6	30117370	30117690	1522	PSN	2	0	30117408	0.799	30117682	0.131	+
chr5	46623486	46623806	1523	PSN	1	0	46623516	0.881	46623596	0.409	+
chr8	3244976	3245296	1524	PSN	1	0	3245003	0.899	3245088	0.373	+
chr6	45828237	45828557	1525	PSN	0	0	45828305	0.916	45828534	0.485	+
chr19	7772285	7772605	1526	PSN	2	0	7772392	0.718	7772604	0.164	+
chr18	38645383	38645703	1527	PSN	1	1	38645403	0.926	38645702	0.422	-
chr23	3778342	3778662	1528	PSN	0	0	3778615	0.83	3778345	0.274	-
chr15	17234835	17235155	1529	PSN	0	3	17234892	0.815	17235154	0.61	+
chr11	29432254	29432574	1530	PSN	0	0	29432403	0.908	29432255	0.108	+
chr15	16996295	16996615	1531	PSN	0	1	16996321	0.756	16996437	0.362	+
chr15	11816093	11816413	1532	PSN	3	3	11816161	0.845	11816255	0.526	+
chr13	38719830	38720150	1533	PSN	1	0	38720129	0.721	38719830	0.297	-
chr1	41294657	41294977	1534	PSN	0	0	41294691	0.829	41294820	0.407	+
chr24	30262392	30262712	1535	PSN	0	0	30262495	0.817	30262392	0.23	+
chr14	38943201	38943521	1536	PSN	3	0	38943230	0.764	38943355	0.373	+
chr2	31851723	31852043	1537	PSN	2	0	31851909	0.923	31852042	0.3	-
chr9	32351325	32351645	1538	PSN	1	2	32351442	0.864	32351644	0.299	-
chr11	43712692	43713012	1539	PSN	2	0	NaN	NaN	NaN	NaN	NaN
chr2	47585382	47585702	1540	PSN	0	0	47585404	0.896	47585524	0.353	+
chr7	31704920	31705240	1541	PSN	2	0	31704981	0.695	31704929	0.47	+
chr5	71708800	71709120	1542	PSN	2	1	71708964	0.836	71709118	0.183	-
chr12	7471234	7471554	1543	PSN	1	0	7471437	0.5	7471234	0.146	+
chr10	43957931	43958251	1544	PSN	3	0	43958085	0.679	43958234	0.36	+
chr3	14809422	14809742	1545	PSN	1	1	NaN	NaN	NaN	NaN	NaN
chr9	26759538	26759858	1546	PSN	2	2	26759718	0.71	26759551	0.164	+
chr19	42530126	42530446	1547	PSN	0	0	42530445	0.762	42530126	0.109	+
chr19	36416523	36416843	1548	PSN	0	0	36416704	0.8	36416525	0.0849	+
chr17	29089194	29089514	1549	PSN	0	1	29089304	0.938	29089194	0.224	+
chr1	55279580	55279900	1550	PSN	1	0	55279636	0.797	55279897	0.362	+
chr3	41900435	41900755	1551	PSN	2	1	41900565	0.767	41900698	0.441	-
chr10	9390100	9390420	1552	PSN	3	0	9390298	0.774	9390185	0.458	-
chr12	34152417	34152737	1553	PSN	2	1	34152644	0.85	34152417	0.132	-
chr20	36993865	36994185	1554	PSN	1	0	36994022	0.778	36994102	0.498	-
chr12	28420010	28420330	1555	PSN	1	0	NaN	NaN	NaN	NaN	NaN
chr2	29766738	29767058	1556	PSN	1	0	29766906	0.672	29767055	0.18	-
chr10	16243255	16243575	1557	PSN	1	2	16243415	0.827	16243255	0.218	+
chr9	768063	768383	1558	PSN	0	0	NaN	NaN	NaN	NaN	NaN
chr9	10919640	10919960	1559	PSN	0	0	10919802	0.795	10919643	0.0587	+
chr17	48943355	48943675	1560	PSN	2	0	48943578	0.69	48943674	0.404	-
chr14	531360	531680	1561	PSN	1	1	NaN	NaN	NaN	NaN	NaN
chr14	33238302	33238622	1562	PSN	2	0	33238465	0.792	33238302	0.353	+
chr12	8886367	8886687	1563	PSN	4	1	NaN	NaN	NaN	NaN	NaN
chr5	62034215	62034535	1564	PSN	1	0	NaN	NaN	NaN	NaN	NaN
chr5	27656312	27656632	1565	PSN	0	2	27656331	0.804	27656620	0.495	+
chr17	23503008	23503328	1566	PSN	1	0	NaN	NaN	NaN	NaN	NaN
chr5	54924115	54924435	1567	PSN	0	0	54924431	0.891	54924115	0.52	-
chr5	43518525	43518845	1568	PSN	0	1	43518729	0.74	43518844	0.22	-
chr14	41678719	41679039	1569	PSN	0	1	41678854	0.654	41678748	0.179	+
chr3	43786238	43786558	1570	PSN	2	0	43786424	0.813	43786240	0.134	+
chr19	41216318	41216638	1571	PSN	4	0	41216568	0.682	41216420	0.474	-
chr13	32963424	32963744	1572	PSN	0	2	32963685	0.835	32963557	0.229	+
chr20	7015159	7015479	1573	PSN	3	0	7015456	0.759	7015357	0.27	-
chr12	5347940	5348260	1574	PSN	2	0	5347993	0.83	5348132	0.389	-
chr12	24938139	24938459	1575	PSN	2	1	24938347	0.842	24938158	0.447	-
chr1	19602850	19603170	1576	PSN	3	0	19603113	0.797	19602856	0.361	-
chr10	14012366	14012686	1577	PSN	1	1	14012478	0.673	14012390	0.407	+
chr10	17429220	17429540	1578	PSN	1	0	17429506	0.863	17429220	0.229	-
chr7	17900168	17900488	1579	PSN	0	0	NaN	NaN	NaN	NaN	NaN
chr6	23200723	23201043	1580	PSN	2	0	NaN	NaN	NaN	NaN	NaN
chr5	75456225	75456545	1581	PSN	0	1	75456301	0.775	75456544	0.36	+
chr9	37348712	37349032	1582	PSN	2	1	37348903	0.851	37349007	0.421	-
chr22	11252708	11253028	1583	PSN	0	0	11252906	0.843	11253027	0.312	-
chr25	13571187	13571507	1584	PSN	0	2	13571246	0.915	13571506	0.349	+
chr3	45418294	45418614	1585	PSN	2	2	45418482	0.724	45418562	0.316	-
chr13	45451340	45451660	1586	PSN	2	1	45451396	0.795	45451475	0.492	+
chr3	56623887	56624207	1587	PSN	0	0	56624051	0.85	56624145	0.481	-
chr4	15394433	15394753	1588	PSN	3	2	15394752	0.771	15394662	0.218	+
chr17	41652768	41653088	1589	PSN	2	1	41652914	0.702	41652814	0.39	+
chr16	23052652	23052972	1590	PSN	0	0	23052755	0.934	23052673	0.595	+
chr18	23654451	23654771	1591	PSN	0	0	23654770	0.766	23654506	0.319	-
chr1	59597393	59597713	1592	PSN	3	0	NaN	NaN	NaN	NaN	NaN
chr18	18113240	18113560	1593	PSN	1	0	18113343	0.865	18113449	0.315	+
chr17	29091623	29091943	1594	PSN	0	0	29091822	0.657	29091942	0.296	-
chr1	12190880	12191200	1595	PSN	3	0	12191124	0.737	12191097	0.48	-
chr7	34341223	34341543	1596	PSN	1	0	34341401	0.868	34341542	0.366	-
chr18	18096928	18097248	1597	PSN	2	1	18097247	0.718	18097142	0.201	+
chr24	8410210	8410530	1598	PSN	2	1	8410489	0.745	8410210	0.311	+
chr15	17447204	17447524	1599	PSN	0	2	17447290	0.85	17447405	0.434	-
chr3	34546428	34546748	1600	PSN	0	2	34546601	0.765	34546696	0.494	-
chr21	12295728	12296048	1601	PSN	2	0	12295730	0.774	12296030	0.342	+
chr10	27857653	27857973	1602	PSN	3	0	27857745	0.859	27857889	0.504	-
chr7	29393928	29394248	1603	PSN	1	0	29394143	0.751	29393931	0.423	+
chr7	47444153	47444473	1604	PSN	1	0	NaN	NaN	NaN	NaN	NaN
chr8	54503552	54503872	1605	PSN	1	3	54503688	0.853	54503816	0.432	-
chr17	45948586	45948906	1606	PSN	0	0	45948723	0.853	45948608	0.214	+
chr18	33006795	33007115	1607	PSN	1	0	33006940	0.876	33006800	0.134	+
chr6	979612	979932	1608	PSN	2	0	979662	0.889	979774	0.414	+
chr9	11535756	11536076	1609	PSN	0	0	11536025	0.852	11535895	0.331	-
chr2	47575126	47575446	1610	PSN	1	3	47575126	0.785	47575445	0.181	-
chr7	23993385	23993705	1611	PSN	3	0	23993485	0.455	23993631	0.223	-
chr6	23728579	23728899	1612	PSN	2	0	23728734	0.825	23728579	0.0691	+
chr22	5632169	5632489	1613	PSN	1	0	5632479	0.765	5632302	0.457	-
chr5	33996511	33996831	1614	PSN	1	1	33996631	0.725	33996511	0.209	+
chr23	9588161	9588481	1615	PSN	1	0	9588212	0.9	9588293	0.446	+
chr18	10254270	10254590	1616	PSN	0	1	10254423	0.845	10254286	0.299	+
chr15	32554937	32555257	1617	PSN	4	0	32555055	0.634	32554938	0.29	+
chr11	25887149	25887469	1618	PSN	1	0	25887463	0.796	25887354	0.518	-
chr7	38783829	38784149	1619	PSN	0	1	NaN	NaN	NaN	NaN	NaN
chr6	33957920	33958240	1620	PSN	2	1	33958197	0.735	33957923	0.307	-
chr5	43635943	43636263	1621	PSN	0	0	43635971	0.923	43636104	0.248	+
chr22	16717853	16718173	1622	PSN	0	0	16718033	0.899	16717875	0.0449	+
chr25	35186388	35186708	1623	PSN	2	2	35186596	0.789	35186481	0.469	+
chr13	35008215	35008535	1624	PSN	1	0	35008385	0.719	35008520	0.333	-
chr23	23064059	23064379	1625	PSN	2	0	23064062	0.838	23064373	0.12	+
chr15	37497560	37497880	1626	PSN	1	0	37497741	0.8	37497597	0.378	+
chr25	18410225	18410545	1627	PSN	3	2	18410382	0.662	18410229	0.2	+
chr14	15822129	15822449	1628	PSN	3	1	15822441	0.888	15822330	0.145	+
chr21	32731689	32732009	1629	PSN	0	1	32731784	0.821	32731689	0.194	+
chr1	4176416	4176736	1630	PSN	1	0	4176699	0.88	4176582	0.371	-
chr9	34279444	34279764	1631	PSN	0	0	34279527	0.822	34279763	0.414	+
chr5	30172665	30172985	1632	PSN	1	0	30172812	0.79	30172701	0.426	+
chr1	18418308	18418628	1633	PSN	1	0	NaN	NaN	NaN	NaN	NaN
chr7	54572214	54572534	1634	PSN	0	1	54572391	0.709	54572216	0.124	+
chr16	39476493	39476813	1635	PSN	0	1	39476647	0.9	39476812	0.159	-
chr17	38417400	38417720	1636	PSN	1	0	NaN	NaN	NaN	NaN	NaN
chr14	40000394	40000714	1637	PSN	1	0	40000640	0.748	40000399	0.475	-
chr19	46058194	46058514	1638	PSN	3	0	46058321	0.752	46058194	0.195	+
chr19	15051724	15052044	1639	PSN	0	0	15051868	0.755	15051955	0.41	-
chr17	38540587	38540907	1640	PSN	1	1	38540817	0.854	38540587	0.189	+
chr23	25919320	25919640	1641	PSN	3	0	25919353	0.871	25919623	0.326	+
chr23	36130868	36131188	1642	PSN	0	0	36131048	0.794	36130953	0.287	+
chr15	21396055	21396375	1643	PSN	0	0	21396271	0.638	21396347	0.267	-
chr2	23330535	23330855	1644	PSN	3	0	NaN	NaN	NaN	NaN	NaN
chr1	17602377	17602697	1645	PSN	1	0	NaN	NaN	NaN	NaN	NaN
chr5	21184088	21184408	1646	PSN	0	0	21184332	0.851	21184125	0.215	-
chr19	42924039	42924359	1647	PSN	1	0	42924292	0.918	42924211	0.272	+
chr6	14404498	14404818	1648	PSN	1	1	14404813	0.688	14404702	0.332	-
chr24	2556190	2556510	1649	PSN	0	0	2556362	0.798	2556508	0.162	-
chr13	4577381	4577701	1650	PSN	0	1	4577469	0.789	4577606	0.24	+
chr1	17601211	17601531	1651	PSN	1	0	17601369	0.76	17601403	0.579	-
chr22	38816135	38816455	1652	PSN	1	2	38816144	0.883	38816420	0.454	+
chr17	36060803	36061123	1653	PSN	1	1	36060960	0.874	36060845	0.464	+
chr13	19728504	19728824	1654	PSN	1	0	19728652	0.856	19728504	0.221	+
chr6	10691611	10691931	1655	PSN	2	1	10691832	0.857	10691930	0.17	-
chr22	22676140	22676460	1656	PSN	2	0	22676177	0.802	22676324	0.465	+
chr20	37893568	37893888	1657	PSN	0	1	37893758	0.735	37893568	0.258	+
chr1	25879926	25880246	1658	PSN	1	0	25880241	0.828	25880163	0.354	-
chr6	9302524	9302844	1659	PSN	0	0	9302634	0.89	9302524	0.252	+
chr5	55158403	55158723	1660	PSN	1	0	55158637	0.733	55158498	0.341	+
chr4	11685633	11685953	1661	PSN	0	1	11685674	0.851	11685788	0.33	-
chr12	21570393	21570713	1662	PSN	1	0	21570651	0.861	21570518	0.54	-
chr13	39774480	39774800	1663	PSN	1	0	39774772	0.84	39774660	0.286	-
chr5	29756044	29756364	1664	PSN	0	0	NaN	NaN	NaN	NaN	NaN
chr17	21541688	21542008	1665	PSN	2	1	21541759	0.776	21541911	0.354	-
chr13	49168969	49169289	1666	PSN	1	3	49169288	0.794	49169214	0.414	-
chr2	48420764	48421084	1667	PSN	0	1	48420968	0.852	48420894	0.561	+
chr17	30255352	30255672	1668	PSN	1	0	30255394	0.934	30255671	0.314	+
chr24	12735839	12736159	1669	PSN	2	0	NaN	NaN	NaN	NaN	NaN
chr25	22935830	22936150	1670	PSN	2	0	22936149	0.62	22936067	0.335	-
chr16	34997193	34997513	1671	PSN	1	1	34997432	0.921	34997198	0.545	-
chr14	32111169	32111489	1672	PSN	2	1	32111430	0.905	32111191	0.156	+
chr17	11024812	11025132	1673	PSN	2	0	11024948	0.645	11024812	0.212	+
chr16	17220967	17221287	1674	PSN	0	1	17221057	0.779	17220973	0.396	+
chr23	3497907	3498227	1675	PSN	1	1	NaN	NaN	NaN	NaN	NaN
chr15	26012027	26012347	1676	PSN	1	0	26012185	0.833	26012331	0.278	-
chr6	27375324	27375644	1677	PSN	1	1	27375631	0.875	27375330	0.151	-
chr8	54026448	54026768	1678	PSN	1	2	54026504	0.889	54026716	0.577	+
chr22	26662607	26662927	1679	PSN	0	0	26662777	0.828	26662902	0.565	-
chr12	45258879	45259199	1680	PSN	2	1	45259082	0.773	45259189	0.312	-
chr1	33075023	33075343	1681	PSN	1	0	33075201	0.871	33075111	0.318	+
chr1	38585245	38585565	1682	PSN	0	0	38585325	0.83	38585246	0.379	+
chr4	5328181	5328501	1683	PSN	0	1	5328294	0.798	5328460	0.195	+
chr20	23984654	23984974	1684	PSN	1	0	NaN	NaN	NaN	NaN	NaN
chr5	60024331	60024651	1685	PSN	3	0	60024549	0.823	60024412	0.349	+
chr3	53656324	53656644	1686	PSN	3	0	53656358	0.878	53656641	0.413	+
chr15	37035062	37035382	1687	PSN	1	1	37035287	0.844	37035193	0.303	-
chr12	5933529	5933849	1688	PSN	1	0	5933658	0.691	5933532	0.151	+
chr25	29769366	29769686	1689	PSN	1	0	29769489	0.792	29769669	0.0729	-
chr16	39464559	39464879	1690	PSN	2	0	39464690	0.759	39464568	0.269	+
chr14	32983672	32983992	1691	PSN	4	0	32983757	0.523	32983688	0.326	+
chr14	41603979	41604299	1692	PSN	0	0	41603979	0.875	41604221	0.272	+
chr23	17278719	17279039	1693	PSN	3	0	17278961	0.916	17278886	0.487	-
chr7	74111115	74111435	1694	PSN	1	3	74111423	0.869	74111115	0.00857	-
chr9	43805756	43806076	1695	PSN	1	0	43805962	0.661	43805872	0.278	-
chr8	49092397	49092717	1696	PSN	0	1	49092517	0.847	49092397	0.356	+
chr17	20059535	20059855	1697	PSN	1	0	20059827	0.93	20059692	0.266	+
chr23	26750628	26750948	1698	PSN	1	0	26750801	0.732	26750947	0.109	-
chr24	17742462	17742782	1699	PSN	0	3	17742695	0.929	17742781	0.476	-
chr24	24443096	24443416	1700	PSN	0	2	24443264	0.945	24443126	0.162	+
chr13	5858617	5858937	1701	PSN	0	0	5858727	0.887	5858617	0.458	+
chr13	34055235	34055555	1702	PSN	0	2	34055516	0.855	34055425	0.434	-
chr9	19159231	19159551	1703	PSN	1	1	19159429	0.776	19159249	0.0363	+
chr8	22258193	22258513	1704	PSN	0	1	22258405	0.72	22258283	0.0962	+
chr8	24538778	24539098	1705	PSN	0	0	24539055	0.799	24538796	0.258	-
chr14	22845559	22845879	1706	PSN	0	0	22845755	0.894	22845559	0.297	-
chr12	36602194	36602514	1707	PSN	0	0	36602435	0.868	36602194	0.307	-
chr7	27853922	27854242	1708	PSN	1	1	27854040	0.765	27853989	0.517	+
chr1	18413872	18414192	1709	PSN	1	0	18414055	0.92	18413953	0.34	+
chr14	20747739	20748059	1710	PSN	2	1	20747889	0.745	20748034	0.188	-
chr4	11992329	11992649	1711	PSN	2	1	11992437	0.84	11992595	0.253	+
chr23	25147095	25147415	1712	PSN	0	1	25147167	0.681	25147400	0.11	+
chr13	17522055	17522375	1713	PSN	0	0	17522265	0.854	17522365	0.518	-
chr13	47048265	47048585	1714	PSN	1	0	47048428	0.764	47048266	0.119	+
chr11	35599149	35599469	1715	PSN	0	1	35599287	0.738	35599443	0.23	+
chr20	31677937	31678257	1716	PSN	0	1	31678189	0.674	31678150	0.454	-
chr19	6802934	6803254	1717	PSN	0	2	6803177	0.917	6803083	0.427	-
chr3	17561085	17561405	1718	PSN	1	1	17561130	0.929	17561404	0.46	-
chr2	17591982	17592302	1719	PSN	1	0	17592282	0.714	17592141	0.333	+
chr8	54855080	54855400	1720	PSN	1	3	54855399	0.702	54855121	0.349	-
chr22	2424793	2425113	1721	PSN	1	1	2425007	0.781	2425112	0.334	-
chr12	26327654	26327974	1722	PSN	2	2	26327692	0.886	26327973	0.272	+
chr16	21369308	21369628	1723	PSN	0	4	NaN	NaN	NaN	NaN	NaN
chr13	4061212	4061532	1724	PSN	0	0	4061392	0.689	4061284	0.321	+
chr15	18974341	18974661	1725	PSN	1	1	18974349	0.795	18974447	0.472	+
chr11	30821858	30822178	1726	PSN	1	1	NaN	NaN	NaN	NaN	NaN
chr7	55925050	55925370	1727	PSN	1	0	55925050	0.845	55925251	0.463	+
chr25	28296749	28297069	1728	PSN	2	0	28296864	0.716	28296989	0.263	-
chr2	19275036	19275356	1729	PSN	2	0	19275254	0.662	19275040	0.339	-
chr15	22319797	22320117	1730	PSN	1	0	22320048	0.803	22319857	0.341	-
chr8	7536847	7537167	1731	PSN	0	0	NaN	NaN	NaN	NaN	NaN
chr13	36938379	36938699	1732	PSN	1	2	NaN	NaN	NaN	NaN	NaN
chr19	30548917	30549237	1733	PSN	0	1	30549183	0.873	30549039	0.333	+
chr11	38693632	38693952	1734	PSN	1	2	38693805	0.756	38693883	0.459	-
chr18	22350297	22350617	1735	PSN	1	0	22350454	0.856	22350309	0.259	+
chr18	45900839	45901159	1736	PSN	2	0	45901009	0.697	45901155	0.242	-
chr16	26240869	26241189	1737	PSN	0	1	26241024	0.82	26241146	0.324	-
chr3	26511895	26512215	1738	PSN	2	0	26512069	0.814	26511960	0.367	+
chr21	5247696	5248016	1739	PSN	0	0	NaN	NaN	NaN	NaN	NaN
chr2	26167323	26167643	1740	PSN	2	0	26167469	0.879	26167346	0.144	+
chr24	43465066	43465386	1741	PSN	2	2	NaN	NaN	NaN	NaN	NaN
chr25	35693832	35694152	1742	PSN	1	0	35693971	0.926	35693835	0.192	+
chr16	9002114	9002434	1743	PSN	0	2	NaN	NaN	NaN	NaN	NaN
chr1	51237396	51237716	1744	PSN	1	0	51237694	0.805	51237396	0.24	+
chr5	65680229	65680549	1745	PSN	3	0	65680479	0.889	65680346	0.475	-
chr15	28051711	28052031	1746	PSN	1	0	28051898	0.853	28051778	0.261	-
chr12	46932099	46932419	1747	PSN	1	1	NaN	NaN	NaN	NaN	NaN
chr2	32602312	32602632	1748	PSN	1	1	32602407	0.822	32602312	0.464	+
chr9	27420711	27421031	1749	PSN	3	1	NaN	NaN	NaN	NaN	NaN
chr8	15998163	15998483	1750	PSN	0	2	15998228	0.903	15998283	0.602	+
chr17	17293943	17294263	1751	PSN	0	0	17293990	0.847	17294262	0.382	+
chr18	39902585	39902905	1752	PSN	0	1	39902712	0.743	39902904	0.477	+
chr18	20053749	20054069	1753	PSN	1	0	NaN	NaN	NaN	NaN	NaN
chr2	20492829	20493149	1754	PSN	0	0	20493108	0.812	20492996	0.319	+
chr1	18398883	18399203	1755	PSN	1	0	18399034	0.883	18399145	0.283	-
chr13	34049646	34049966	1756	PSN	1	1	34049704	0.613	34049960	0.133	+
chr15	29073857	29074177	1757	PSN	0	1	29073992	0.812	29073857	0.0891	+
chr22	18582254	18582574	1758	PSN	0	0	18582526	0.838	18582255	0.223	-
chr13	19827970	19828290	1759	PSN	1	0	19828122	0.82	19828289	0.411	-
chr3	37810474	37810794	1760	PSN	0	1	37810611	0.84	37810474	0.297	+
chr20	4099677	4099997	1761	PSN	2	0	NaN	NaN	NaN	NaN	NaN
chr16	57581224	57581544	1762	PSN	1	1	57581254	0.888	57581537	0.327	-
chr1	42840630	42840950	1763	PSN	2	1	42840700	0.823	42840915	0.479	+
chr7	53936998	53937318	1764	PSN	1	2	53937228	0.862	53937080	0.534	-
chr5	27036127	27036447	1765	PSN	1	0	27036212	0.85	27036429	0.375	-
chr9	29224014	29224334	1766	PSN	1	0	29224017	0.772	29224154	0.348	+
chr17	38439677	38439997	1767	PSN	2	1	38439712	0.815	38439854	0.502	+
chr14	4236475	4236795	1768	PSN	1	0	4236578	0.741	4236794	0.208	-
chr20	23018872	23019192	1769	PSN	1	0	NaN	NaN	NaN	NaN	NaN
chr2	29536958	29537278	1770	PSN	1	0	NaN	NaN	NaN	NaN	NaN
chr2	42687767	42688087	1771	PSN	1	0	42687898	0.814	42687771	0.436	+
chr5	48027205	48027525	1772	PSN	1	0	48027322	0.816	48027506	0.175	+
chr18	6237114	6237434	1773	PSN	0	1	6237315	0.766	6237187	0.0987	+
chr7	29242590	29242910	1774	PSN	0	1	29242852	0.872	29242705	0.309	+
chr4	11997828	11998148	1775	PSN	0	0	11997984	0.913	11997829	0.206	+
chr24	18171657	18171977	1776	PSN	1	1	18171888	0.836	18171751	0.122	+
chr20	30286472	30286792	1777	PSN	1	0	30286501	0.833	30286786	0.422	+
chr20	36945153	36945473	1778	PSN	1	2	36945276	0.715	36945465	0.159	+
chr6	34389555	34389875	1779	PSN	1	0	34389874	0.714	34389555	0.28	-
chr5	36648310	36648630	1780	PSN	0	1	36648541	0.783	36648314	0.0789	-
chr13	17407824	17408144	1781	PSN	0	1	17407967	0.869	17408113	0.273	-
chr5	67282373	67282693	1782	PSN	1	0	67282457	0.861	67282540	0.312	+
chr4	14391304	14391624	1783	PSN	1	1	14391310	0.88	14391425	0.521	+
chr8	27721918	27722238	1784	PSN	1	0	27721999	0.857	27722069	0.335	+
chr7	43065075	43065395	1785	PSN	1	2	43065150	0.643	43065365	0.186	-
chr6	56277291	56277611	1786	PSN	1	1	NaN	NaN	NaN	NaN	NaN
chr11	33303152	33303472	1787	PSN	0	0	33303429	0.897	33303294	0.327	+
chr19	9852763	9853083	1788	PSN	0	0	9853015	0.835	9852896	0.279	-
chr1	38583043	38583363	1789	PSN	1	3	38583205	0.584	38583362	0.121	-
chr23	22609177	22609497	1790	PSN	2	0	22609397	0.786	22609494	0.444	-
chr4	11190098	11190418	1791	PSN	0	0	11190407	0.75	11190129	0.271	-
chr13	53015276	53015596	1792	PSN	2	0	NaN	NaN	NaN	NaN	NaN
chr12	49397237	49397557	1793	PSN	2	1	49397462	0.922	49397367	0.319	-
chr23	28621290	28621610	1794	PSN	0	1	28621477	0.737	28621332	0.208	+
chr16	9382945	9383265	1795	PSN	0	1	9383177	0.883	9382959	0.0787	+
chr13	32208073	32208393	1796	PSN	1	1	32208130	0.763	32208073	0.488	+
chr2	39841341	39841661	1797	PSN	1	2	NaN	NaN	NaN	NaN	NaN
chr7	36578555	36578875	1798	PSN	1	3	36578855	0.658	36578555	0.08	-
chr4	9736204	9736524	1799	PSN	1	0	9736245	0.908	9736523	0.362	+
chr9	24488530	24488850	1800	PSN	1	1	24488720	0.849	24488540	0.184	-
chr16	27499257	27499577	1801	PSN	3	0	27499538	0.677	27499453	0.304	-
chr14	5827008	5827328	1802	PSN	0	2	5827317	0.861	5827227	0.407	-
chr10	39019368	39019688	1803	PSN	0	0	39019576	0.825	39019523	0.526	+
chr9	29162693	29163013	1804	PSN	0	1	29162743	0.876	29162857	0.268	+
chr8	27809478	27809798	1805	PSN	0	0	27809679	0.796	27809525	0.194	-
chr23	29323642	29323962	1806	PSN	1	0	NaN	NaN	NaN	NaN	NaN
chr20	13362676	13362996	1807	PSN	3	0	13362875	0.708	13362995	0.181	-
chr16	13768577	13768897	1808	PSN	1	1	13768875	0.848	13768577	0.226	-
chr2	17579968	17580288	1809	PSN	0	0	17579968	0.807	17580071	0.362	-
chr20	35102653	35102973	1810	PSN	1	0	35102671	0.856	35102804	0.462	-
chr7	30816809	30817129	1811	PSN	1	0	30816871	0.839	30817017	0.347	-
chr6	16168555	16168875	1812	PSN	0	1	16168603	0.855	16168670	0.594	+
chr15	32354583	32354903	1813	PSN	0	0	NaN	NaN	NaN	NaN	NaN
chr2	33700523	33700843	1814	PSN	1	0	33700681	0.836	33700563	0.387	+
chr2	52013233	52013553	1815	PSN	0	2	52013237	0.885	52013526	0.447	+
chr23	38940569	38940889	1816	PSN	3	0	38940739	0.627	38940888	0.0435	-
chr16	35119038	35119358	1817	PSN	1	3	35119221	0.819	35119329	0.4	-
chr6	31678833	31679153	1818	PSN	3	0	31678978	0.672	31679152	0.202	-
chr6	33394332	33394652	1819	PSN	2	0	33394542	0.712	33394650	0.387	-
chr9	54922827	54923147	1820	PSN	0	1	NaN	NaN	NaN	NaN	NaN
chr14	38911238	38911558	1821	PSN	2	0	38911438	0.864	38911245	0.575	+
chr14	9743352	9743672	1822	PSN	1	1	9743534	0.792	9743377	0.12	+
chr5	40645605	40645925	1823	PSN	0	0	40645691	0.719	40645614	0.283	+
chr11	44209448	44209768	1824	PSN	3	1	44209616	0.809	44209767	0.353	-
chr21	36524578	36524898	1825	PSN	0	1	36524702	0.887	36524578	0.32	+
chr11	18808883	18809203	1826	PSN	2	0	18808908	0.596	18808991	0.369	+
chr24	12730735	12731055	1827	PSN	1	1	12730873	0.822	12730757	0.275	+
chr14	33688294	33688614	1828	PSN	1	1	33688347	0.882	33688455	0.49	+
chr17	22266790	22267110	1829	PSN	3	0	22266925	0.788	22267035	0.232	-
chr16	39628961	39629281	1830	PSN	2	0	39629212	0.793	39629023	0.359	-
chr14	32936591	32936911	1831	PSN	1	1	32936596	0.812	32936648	0.364	+
chr3	45847463	45847783	1832	PSN	0	1	45847592	0.654	45847741	0.118	-
chr22	14079004	14079324	1833	PSN	0	2	14079125	0.687	14079270	0.207	-
chr22	21338758	21339078	1834	PSN	0	0	21338957	0.827	21338809	0.333	+
chr23	32957402	32957722	1835	PSN	0	0	32957607	0.865	32957499	0.33	+
chr5	69691980	69692300	1836	PSN	0	0	69692141	0.809	69692287	0.521	-
chr17	34178725	34179045	1837	PSN	1	0	NaN	NaN	NaN	NaN	NaN
chr7	66571074	66571394	1838	PSN	0	0	66571129	0.878	66571239	0.497	+
chr19	28643214	28643534	1839	PSN	0	0	28643533	0.738	28643237	0.144	+
chr24	19337017	19337337	1840	PSN	1	0	19337162	0.826	19337054	0.204	+
chr10	45807134	45807454	1841	PSN	0	2	NaN	NaN	NaN	NaN	NaN
chr4	14186078	14186398	1842	PSN	2	2	14186154	0.738	14186294	0.405	-
chr3	30915046	30915366	1843	PSN	2	1	30915361	0.807	30915050	0.262	-
chr7	40951924	40952244	1844	PSN	1	1	40952135	0.905	40952243	0.209	-
chr9	21402077	21402397	1845	PSN	3	0	21402211	0.819	21402077	0.35	+
chr9	9884063	9884383	1846	PSN	2	0	9884337	0.861	9884101	0.205	-
chr16	39469682	39470002	1847	PSN	2	0	39469743	0.787	39469980	0.386	+
chr14	14418658	14418978	1848	PSN	0	3	14418805	0.879	14418909	0.167	-
chr5	57915018	57915338	1849	PSN	0	0	57915160	0.957	57915018	0.199	+
chr23	15687433	15687753	1850	PSN	1	0	15687622	0.748	15687737	0.547	-
chr23	30805105	30805425	1851	PSN	2	2	30805107	0.783	30805274	0.342	+
chr21	38292460	38292780	1852	PSN	1	1	38292546	0.867	38292779	0.393	-
chr7	17837551	17837871	1853	PSN	1	1	17837836	0.897	17837577	0.302	-
chr1	51692762	51693082	1854	PSN	0	2	51692922	0.875	51693028	0.416	-
chr1	4357477	4357797	1855	PSN	1	0	4357668	0.834	4357796	0.399	-
chr7	35003623	35003943	1856	PSN	0	0	35003940	0.89	35003802	0.324	+
chr23	28499998	28500318	1857	PSN	0	0	28500100	0.829	28499998	0.564	+
chr2	39042541	39042861	1858	PSN	0	1	39042798	0.751	39042695	0.432	-
chr19	20680889	20681209	1859	PSN	2	1	20681140	0.769	20681022	0.205	+
chr17	9536887	9537207	1860	PSN	2	3	NaN	NaN	NaN	NaN	NaN
chr17	38546170	38546490	1861	PSN	0	2	38546354	0.876	38546309	0.561	+
chr16	32961163	32961483	1862	PSN	2	0	32961308	0.861	32961482	0.158	-
chr20	39317046	39317366	1863	PSN	2	2	39317117	0.852	39317263	0.317	+
chr7	69786065	69786385	1864	PSN	1	1	69786205	0.862	69786353	0.198	-
chr7	30776444	30776764	1865	PSN	2	1	30776458	0.77	30776760	0.18	-
chr9	2004280	2004600	1866	PSN	1	0	NaN	NaN	NaN	NaN	NaN
chr17	30967678	30967998	1867	PSN	1	0	30967895	0.737	30967681	0.0224	+
chr17	38436839	38437159	1868	PSN	1	0	38436951	0.902	38437158	0.238	+
chr11	10043067	10043387	1869	PSN	1	0	NaN	NaN	NaN	NaN	NaN
chr8	48794696	48795016	1870	PSN	1	0	48794797	0.691	48794915	0.248	+
chr19	42659481	42659801	1871	PSN	0	1	42659659	0.718	42659526	0.152	+
chr11	20475039	20475359	1872	PSN	1	0	20475100	0.662	20475351	0.111	+
chr5	24544449	24544769	1873	PSN	0	2	24544749	0.754	24544668	0.216	-
chr20	31768467	31768787	1874	PSN	0	2	31768631	0.831	31768484	0.174	+
chr8	17995667	17995987	1875	PSN	0	0	17995779	0.761	17995667	0.484	+
chr18	17882815	17883135	1876	PSN	1	0	NaN	NaN	NaN	NaN	NaN
chr17	1935601	1935921	1877	PSN	1	0	1935858	0.627	1935759	0.347	+
chr13	44097264	44097584	1878	PSN	0	1	44097339	0.777	44097554	0.147	+
chr13	19818506	19818826	1879	PSN	1	1	19818604	0.823	19818506	0.415	+
chr20	28773457	28773777	1880	PSN	1	0	28773641	0.811	28773757	0.243	-
chr17	30659896	30660216	1881	PSN	3	1	30660037	0.505	30659896	0.0629	+
chr20	22465973	22466293	1882	PSN	1	0	22466205	0.872	22465977	0.174	+
chr2	7024659	7024979	1883	PSN	0	0	7024929	0.798	7024671	0.153	-
chr8	27793783	27794103	1884	PSN	3	0	27793938	0.613	27793821	0.338	+
chr1	28815761	28816081	1885	PSN	2	0	28815880	0.774	28815763	0.405	+
chr7	47644008	47644328	1886	PSN	1	0	47644098	0.629	47644151	0.489	+
chr23	26962908	26963228	1887	PSN	0	0	26963135	0.776	26962912	0.406	-
chr15	18990451	18990771	1888	PSN	3	1	18990679	0.807	18990551	0.525	-
chr21	36535097	36535417	1889	PSN	1	0	36535365	0.883	36535246	0.292	+
chr21	13269595	13269915	1890	PSN	2	0	NaN	NaN	NaN	NaN	NaN
chr7	49851692	49852012	1891	PSN	0	1	49851834	0.835	49851692	0.282	+
chr7	53105948	53106268	1892	PSN	2	1	53106048	0.787	53106154	0.428	+
chr6	31783212	31783532	1893	PSN	1	0	31783378	0.749	31783526	0.175	-
chr9	27988135	27988455	1894	PSN	1	1	NaN	NaN	NaN	NaN	NaN
chr8	32714290	32714610	1895	PSN	0	0	32714330	0.718	32714580	0.205	-
chr17	31195845	31196165	1896	PSN	0	0	31195957	0.818	31196103	0.472	+
chr23	9169371	9169691	1897	PSN	0	0	9169516	0.851	9169371	0.322	+
chr18	24514583	24514903	1898	PSN	1	0	24514587	0.608	24514902	0.129	+
chr20	44789072	44789392	1899	PSN	0	0	44789152	0.933	44789072	0.286	+
chr6	57884296	57884616	1900	PSN	4	1	57884307	0.851	57884583	0.388	-
chr5	51154070	51154390	1901	PSN	0	0	51154128	0.843	51154080	0.468	+
chr9	21404466	21404786	1902	PSN	1	0	21404740	0.81	21404596	0.377	-
chr22	18972179	18972499	1903	PSN	1	0	18972400	0.635	18972222	0.0917	+
chr15	14498683	14499003	1904	PSN	1	1	14498736	0.666	14498866	0.212	+
chr14	506709	507029	1905	PSN	0	2	NaN	NaN	NaN	NaN	NaN
chr20	26470309	26470629	1906	PSN	0	2	26470420	0.688	26470517	0.114	+
chr7	33092234	33092554	1907	PSN	1	1	33092525	0.88	33092432	0.438	-
chr16	39512124	39512444	1908	PSN	1	0	39512282	0.838	39512406	0.312	-
chr19	15001049	15001369	1909	PSN	0	2	15001150	0.824	15001206	0.541	+
chr5	64697369	64697689	1910	PSN	1	1	64697570	0.702	64697431	0.234	+
chr16	32959488	32959808	1911	PSN	1	0	NaN	NaN	NaN	NaN	NaN
chr23	34560826	34561146	1912	PSN	3	1	NaN	NaN	NaN	NaN	NaN
chr14	45116349	45116669	1913	PSN	2	0	45116668	0.765	45116579	0.341	+
chr11	9278342	9278662	1914	PSN	3	0	9278485	0.74	9278351	0.175	+
chr22	35974289	35974609	1915	PSN	1	0	35974460	0.856	35974577	0.347	-
chr6	45829830	45830150	1916	PSN	0	3	45829988	0.844	45829830	0.251	+
chr5	52193918	52194238	1917	PSN	2	0	52193922	0.694	52194029	0.334	+
chr9	31910360	31910680	1918	PSN	2	0	31910616	0.814	31910532	0.325	-
chr8	8517137	8517457	1919	PSN	2	1	NaN	NaN	NaN	NaN	NaN
chr19	32572531	32572851	1920	PSN	2	0	32572655	0.84	32572552	0.451	+
chr17	27100269	27100589	1921	PSN	1	0	27100358	0.875	27100271	0.323	+
chr1	39277840	39278160	1922	PSN	2	0	39277971	0.663	39277887	0.327	+
chr1	23007409	23007729	1923	PSN	2	2	23007431	0.755	23007728	0.357	+
chr7	5291810	5292130	1924	PSN	1	0	5291980	0.854	5291854	0.24	+
chr22	10146134	10146454	1925	PSN	2	2	10146146	0.672	10146199	0.541	+
chr20	53987704	53988024	1926	PSN	3	0	53987879	0.676	53987976	0.316	-
chr5	14482254	14482574	1927	PSN	0	0	14482323	0.919	14482448	0.273	-
chr11	19029596	19029916	1928	PSN	3	0	19029767	0.739	19029914	0.338	-
chr15	19443167	19443487	1929	PSN	1	0	19443320	0.942	19443226	0.355	+
chr12	36106961	36107281	1930	PSN	1	0	36107134	0.613	36107277	0.077	-
chr1	22564702	22565022	1931	PSN	0	0	22564779	0.822	22564904	0.499	-
chr16	40977998	40978318	1932	PSN	2	0	40978198	0.639	40978071	0.202	+
chr14	6943981	6944301	1933	PSN	2	0	6944261	0.902	6943985	0.134	-
chr14	21632298	21632618	1934	PSN	1	1	21632603	0.829	21632298	0.0842	-
chr21	15910217	15910537	1935	PSN	2	1	15910536	0.845	15910445	0.171	+
chr21	33721394	33721714	1936	PSN	1	2	33721548	0.713	33721695	0.267	-
chr1	9627054	9627374	1937	PSN	1	1	9627223	0.828	9627319	0.141	-
chr7	55898392	55898712	1938	PSN	0	1	55898641	0.811	55898392	0.348	-
chr5	67607065	67607385	1939	PSN	1	1	67607227	0.902	67607065	0.107	+
chr9	25786313	25786633	1940	PSN	1	1	NaN	NaN	NaN	NaN	NaN
chr13	46734835	46735155	1941	PSN	0	0	46734858	0.835	46735154	0.231	+
chr7	47956180	47956500	1942	PSN	0	0	47956404	0.852	47956231	0.575	-
chr9	44871772	44872092	1943	PSN	0	0	44871828	0.708	44871881	0.529	+
chr8	20679447	20679767	1944	PSN	0	2	20679494	0.856	20679703	0.441	+
chr22	11262482	11262802	1945	PSN	0	1	11262770	0.891	11262487	0.443	-
chr2	22058801	22059121	1946	PSN	1	2	22058970	0.669	22059092	0.272	-
chr1	25639620	25639940	1947	PSN	1	1	NaN	NaN	NaN	NaN	NaN
chr4	7516982	7517302	1948	PSN	1	0	7517016	0.812	7517114	0.506	+
chr19	20699032	20699352	1949	PSN	0	0	20699283	0.765	20699351	0.451	-
chr2	6950230	6950550	1950	PSN	1	0	6950241	0.836	6950447	0.235	+
chr25	20780308	20780628	1951	PSN	1	2	NaN	NaN	NaN	NaN	NaN
chr21	17907634	17907954	1952	PSN	0	1	17907798	0.864	17907650	0.174	+
chr16	25514655	25514975	1953	PSN	2	0	25514698	0.737	25514974	0.142	+
chr23	37773457	37773777	1954	PSN	0	1	NaN	NaN	NaN	NaN	NaN
chr25	15173651	15173971	1955	PSN	0	3	15173756	0.797	15173651	0.54	+
chr9	30792740	30793060	1956	PSN	3	0	30793059	0.858	30792782	0.408	-
chr19	26523259	26523579	1957	PSN	1	0	26523578	0.924	26523378	0.361	-
chr2	29803946	29804266	1958	PSN	1	1	29803993	0.805	29804250	0.359	+
chr7	50328098	50328418	1959	PSN	2	2	50328098	0.726	50328218	0.29	-
chr15	16272657	16272977	1960	PSN	1	1	16272826	0.622	16272970	0.312	-
chr16	43987638	43987958	1961	PSN	0	0	43987641	0.881	43987776	0.356	-
chr12	35410940	35411260	1962	PSN	2	1	35411048	0.832	35410940	0.31	+
chr3	16454669	16454989	1963	PSN	1	2	16454846	0.812	16454701	0.068	+
chr2	43649171	43649491	1964	PSN	0	2	43649442	0.785	43649297	0.13	+
chr21	29701040	29701360	1965	PSN	1	0	NaN	NaN	NaN	NaN	NaN
chr6	51181373	51181693	1966	PSN	2	0	51181513	0.729	51181681	0.167	-
chr4	22934763	22935083	1967	PSN	0	0	22934793	0.781	22935082	0.423	+
chr19	14874095	14874415	1968	PSN	1	1	14874330	0.736	14874414	0.352	-
chr22	15533372	15533692	1969	PSN	0	3	15533500	0.756	15533380	0.331	+
chr12	9733331	9733651	1970	PSN	1	1	NaN	NaN	NaN	NaN	NaN
chr23	37899449	37899769	1971	PSN	0	0	37899503	0.896	37899644	0.543	+
chr15	32528293	32528613	1972	PSN	2	2	32528293	0.737	32528612	0.343	+
chr1	51391696	51392016	1973	PSN	1	0	51391782	0.829	51392015	0.242	+
chr19	28713774	28714094	1974	PSN	2	1	28713855	0.757	28714093	0.411	-
chr18	26495200	26495520	1975	PSN	1	0	26495485	0.806	26495231	0.378	-
chr14	18319138	18319458	1976	PSN	1	1	18319210	0.805	18319457	0.476	+
chr10	27648123	27648443	1977	PSN	0	1	27648312	0.879	27648184	0.275	+
chr8	45288564	45288884	1978	PSN	1	1	45288648	0.804	45288746	0.313	+
chr19	12019253	12019573	1979	PSN	1	1	NaN	NaN	NaN	NaN	NaN
chr12	6135431	6135751	1980	PSN	0	0	6135609	0.813	6135433	0.143	+
chr21	23595165	23595485	1981	PSN	1	1	23595472	0.761	23595358	0.381	-
chr20	23255049	23255369	1982	PSN	1	1	23255189	0.844	23255106	0.427	+
chr6	18043024	18043344	1983	PSN	2	3	18043065	0.901	18043315	0.194	+
chr19	15851348	15851668	1984	PSN	1	1	15851517	0.821	15851420	0.377	+
chr13	31035528	31035848	1985	PSN	1	0	31035584	0.789	31035708	0.33	-
chr21	19540725	19541045	1986	PSN	2	1	19540958	0.857	19540804	0.0809	+
chr1	22067207	22067527	1987	PSN	1	0	22067397	0.937	22067526	0.0484	-
chr5	35036127	35036447	1988	PSN	3	1	35036313	0.767	35036424	0.259	-
chr8	32144492	32144812	1989	PSN	1	1	32144631	0.613	32144492	0.261	+
chr8	53809225	53809545	1990	PSN	1	0	53809405	0.825	53809258	0.345	+
chr15	36923916	36924236	1991	PSN	0	0	36924205	0.697	36923916	0.3	-
chr25	1420970	1421290	1992	PSN	2	1	1421102	0.636	1421182	0.292	-
chr12	7212840	7213160	1993	PSN	1	1	7212940	0.829	7212840	0.364	+
chr20	8627715	8628035	1994	PSN	0	1	8627809	0.659	8627715	0.249	+
chr7	15182594	15182914	1995	PSN	1	1	15182622	0.824	15182908	0.394	+
chr6	43211723	43212043	1996	PSN	1	3	43211838	0.869	43211723	0.3	+
chr6	31789903	31790223	1997	PSN	4	0	31790077	0.757	31789903	0.182	+
chr24	26973511	26973831	1998	PSN	1	0	26973565	0.752	26973769	0.217	-
chr12	15560053	15560373	1999	PSN	0	0	15560187	0.758	15560068	0.189	+
[truncated: 26,902 more rows]

## Sheet: legend
Supplemental Table S1. Genomic regions of TFBS used in this study, nucmax and nucmin positions and values, strand for oriented plots.
columns A-C: coordinates (Zv9 assembly) of the genomic regions used in this study. All regions were trimmed to 320 bp
D-unique_number
E- group by TF binding: PSN, PS.,.SN, P.N., P.., ..N, Ppre, control. 8 groups were assigned based on the derived TF binding ChIP-seq data (Leichenring et al.,2013, Xu et al., 2011).
F- number of non-overlapping pou:sox motifs within 320 bp region
G- number of non-overlapping nanog1 and nanog2 motifs within 320 bp region
H- bp. position of max. predicted nucleosome occupancy within 320 bp region
I- max. preducted nucleosome value within 320 bp region
J- bp. position of min. predicted nucleosome occupancy within 320 bp region
K- min. preducted nucleosome value within 320 bp region
L- "+" if the position of predicted nuc.occupancy minimum within +/-160 bp around nuc.max. position (H) is less than H, "-" if otherwise.
